# Supplementary material for: Phenotypic characterization, plant growth and development, genome methylation, and mineral elements composition of neotetraploid lettuce (Lactuca sativa L.)
Source: Front Plant Sci. 2023 Dec 8;14:1296660. doi: 10.3389/fpls.2023.1296660 (PMC10739468; doi:10.3389/fpls.2023.1296660)
Supplement: Supplementary Table 1 — Locations of 498 differentially methylated regions (DMR) detected using whole genome bisulfite sequencing (WGBS). The pivotal DMR (PDMR) are those with an absolute difference in percent methylation between diploids and neotetraploids larger than 50. Positive values in methylation difference indicate hypermethylation in diploids, while negative values indicate hypermethylation in neotetraploids. [file Table_1.xlsx]

## Sheet: DMR_tiled_annotated_w_tss
Chr.	seqnames	start	end	width	strand	pvalue	qvalue	meth.diff	PDMR	dist.to.feature	feature.name	feature.strand	Predicted protein	Function
1	NC_056623.1	5397001	5398000	1000	*	2.42498e-22	6.94582e-19	58.2418	PDMR	0	XM_023905102.2	+	PREDICTED: Lactuca sativa uncharacterized LOC111909300 (LOC111909300), mRNA
1	NC_056623.1	13081001	13082000	1000	*	2.60962e-19	5.35426e-16	64.9064	PDMR	-55	XM_023883519.2	+	PREDICTED: Lactuca sativa homeobox-leucine zipper protein HAT5 (LOC111887350), mRNA	Plant (HD-zip) homeobox-leucine zipper proteins are transcription factors involved in developmental processes . AtHB13 freezing tolerance. AtHB7/ AtHB12 regulate protein phosphatases type 2C (PP2C) and repress PYL5 and PYL8, two ABA receptors, in response to ABA stimulus . AtHB5, AtHB6 and AtHB20 have been shown to function in ABA responses
1	NC_056623.1	14167001	14168000	1000	*	1.25917e-07	2.93813e-05	-40.4762		207	XM_023912432.2	-
1	NC_056623.1	14490001	14491000	1000	*	1.49332e-07	3.42749e-05	26.9231		667	XM_042899168.1	+
1	NC_056623.1	17587001	17588000	1000	*	1.56242e-40	3.06969e-36	-50.8621	PDMR	3320	XM_023911345.2	+	PREDICTED: Lactuca sativa phosphatidylinositol 4-kinase gamma 7 (LOC111915710), mRNA	PHOSPHOSERINE PHOSPHATASE, catalyze the transfer of the gamma-phosphoryl group from ATP to generate the major precursor in the synthesis of other phosphoinositides. Superoxide dismutases (SODs) are ubiquitous metalloproteins that prevent damage by oxygen-mediated free radicals by catalysing the dismutation of superoxide into molecular oxygen and hydrogen peroxide . Superoxide is a normal by-produ…
1	NC_056623.1	19047001	19048000	1000	*	2.31726e-09	8.96206e-07	-50.1296	PDMR	581	XM_023911405.2	+	PREDICTED: Lactuca sativa purple acid phosphatase 2 (LOC111915753), mRNA
1	NC_056623.1	24190001	24191000	1000	*	6.14937e-08	1.57314e-05	-29.0909		1071	XM_023872748.2	-
1	NC_056623.1	31131001	31132000	1000	*	0.000846118	0.0266194	-25.744		-2408	XM_023909333.1	+
1	NC_056623.1	37800001	37801000	1000	*	1.47176e-06	0.000237358	36.7458		820	XM_023905828.2	-
1	NC_056623.1	40468001	40469000	1000	*	1.51481e-09	5.97619e-07	-29.4194		-4054	XM_023905595.2	-
1	NC_056623.1	43364001	43365000	1000	*	5.47594e-05	0.00404458	26.8879		-30068	XR_002847063.2	-
1	NC_056623.1	45285001	45286000	1000	*	1.10787e-09	4.57276e-07	-54.6685	PDMR	-412	XM_023909609.1	+	PREDICTED: Lactuca sativa uncharacterized LOC111913898 (LOC111913898), mRNA
1	NC_056623.1	46762001	46763000	1000	*	2.80323e-08	7.86789e-06	-60	PDMR	28062	XR_002846710.1	-	PREDICTED: Lactuca sativa small nucleolar RNA R71 (LOC111881175), ncRNA Multiple copies?	Sialidases (neuraminidases) hydrolyse the non-reducing, terminal sialic acid linkage in various natural substrates, glycoproteins, glycolipids, gangliosides, and polysaccharides. sialidase forms part of the multi-functional haemagglutinin-sialidase glycoprotein found on the viral envelope, pathogenesis of many diseases (pathogens)
1	NC_056623.1	51870001	51871000	1000	*	5.39353e-15	6.54117e-12	52.8213	PDMR	0	XM_023905743.2	-	PREDICTED: Lactuca sativa GDSL esterase/lipase At5g14450 (LOC111909950), mRNA	Plant specific subfamily of the SGNH-family of hydrolases, a diverse family of lipases and esterases. GDSL-type esterases/lipases are hydrolytic enzymes with multifunctional properties, such as broad substrate specificity, regiospecificity, and stereoselectivity.They have diverse physical functions such as affecting the germination rate and early growth of seedlings subjected to high concentratio…
1	NC_056623.1	51943001	51944000	1000	*	7.03278e-12	4.85466e-09	43.1818		55332	XM_023887357.2	-
1	NC_056623.1	55680001	55681000	1000	*	1.16763e-05	0.00122414	33.4727		501	XM_023885760.2	+
1	NC_056623.1	57654001	57655000	1000	*	3.25028e-20	7.78761e-17	-34.0578		0	XR_002854714.2	-
1	NC_056623.1	61680001	61681000	1000	*	5.30795e-08	1.3831e-05	38.7097		839	XM_042896675.1	-
1	NC_056623.1	65429001	65430000	1000	*	4.68307e-11	2.67466e-08	-62.5	PDMR	5981	XM_023910604.1	-	PREDICTED: Lactuca sativa uncharacterized LOC111914905 (LOC111914905), mRNA
1	NC_056623.1	65435001	65436000	1000	*	4.29493e-13	3.51595e-10	-49.2248		0	XM_023910604.1	-
1	NC_056623.1	66889001	66890000	1000	*	8.42625e-15	9.97294e-12	36.9218		-598	XM_023912307.2	+
1	NC_056623.1	69242001	69243000	1000	*	4.30312e-05	0.00338013	-26.5252		7458	XM_023912221.1	+
1	NC_056623.1	72679001	72680000	1000	*	3.39567e-18	5.98067e-15	-50	PDMR	0	XM_023882338.2	+	PREDICTED: Lactuca sativa cyclin-dependent kinases regulatory subunit 1 (LOC111886103), mRNA	Cyclin-dependent protein kinases CDK interact with cyclins to regulate cell cycle progression, and are required for the G1 and G2 stages of cell division. CDK interact with CKS1. CKS1 helps regulate the cell cycle to increase cell number. In rice, CKS1 encodes a cyclin-dependent kinase subunit, which plays a significant role in regulation of plant infection. CKS1 deletion mutants are severely imp…
1	NC_056623.1	82211001	82212000	1000	*	9.54269e-05	0.0060246	-36.6522		2910	XM_023892946.2	+
1	NC_056623.1	84360001	84361000	1000	*	5.2873e-34	6.37598e-30	-86.1538	PDMR	-3718	XR_006191397.1	+	PREDICTED: Lactuca sativa probable acyl-activating enzyme 16, chloroplastic (LOC111896959), transcript variant X3, misc_RNA	ACYL-ACTIVATING ENZYME 16, CHLOROPLASTIC-RELATED (PTHR43813:SF1) ; AMP-binding domain-containing protein; Long-chain-fatty-acid--[acyl-carrier-protein] ligase AEE15; catalyze the activation of many different carboxylic acids in chloroplast envelope
1	NC_056623.1	84372001	84373000	1000	*	0.000537098	0.0197512	29.1463		3545	XR_006191409.1	-
1	NC_056623.1	84416001	84417000	1000	*	1.45449e-12	1.09909e-09	42.1256		0	XM_023892917.2	+
1	NC_056623.1	86984001	86985000	1000	*	1.25971e-21	3.34454e-18	55.9633	PDMR	662	XM_042898398.1	-	PREDICTED: Lactuca sativa ethylene-responsive transcription factor ERF062-like (LOC122196075), mRNA	Some defense related genes contain a cis-regulatory element the Ethylene-Responsive Element (ERE). the ERE GCC-box is essential for the response to ethylene.This short motif is recognised by a family of transcrition binding factors (ERF). ERF act as transcriptional activators or repressors of GCC box-mediated gene expression. ERFand AP2 has the same protein domain bind and regulate DNA-templated …
1	NC_056623.1	93600001	93601000	1000	*	2.23972e-19	4.78302e-16	54.5455	PDMR	0	XM_023895221.2	-	PREDICTED: Lactuca sativa guanosine nucleotide diphosphate dissociation inhibitor 1 (LOC111899379), mRNA	Guanosine diphosphate (GDP)-dissociation inhibitors (GDIs) belong to one of three classes of proteins that regulate the critical cycling of GTP-binding proteins between the inactive and active states. GDP dissociation inhibitor (GDI) is known to play essential roles in regulating nucleotide states and subcellular localizations of Rab/Ypt proteins.AtGDI1 and AtGDI2 can interact with Ara4, an Arabi…
1	NC_056623.1	95883001	95884000	1000	*	4.98662e-07	9.624e-05	-25.4545		19806	XR_002852919.2	-
1	NC_056623.1	97401001	97402000	1000	*	5.19919e-08	1.35836e-05	34.4074		-54863	XR_006187361.1	+
1	NC_056623.1	116026001	116027000	1000	*	2.36448e-11	1.46085e-08	-25.7295		0	XM_042902384.1	+
1	NC_056623.1	139445001	139446000	1000	*	0.000113895	0.00691073	35.8696		-5126	XR_002858679.1	+
1	NC_056623.1	144303001	144304000	1000	*	1.17048e-10	6.14876e-08	-29.5082		-69513	NA	+
1	NC_056623.1	152807001	152808000	1000	*	1.56973e-11	9.99801e-09	46.0054		-128324	XR_006183494.1	-
1	NC_056623.1	154477001	154478000	1000	*	0.000236934	0.0114094	28.0345		-138823	XM_023881355.2	-
1	NC_056623.1	159405001	159406000	1000	*	4.25912e-06	0.000563874	-26.8293		-55659	XM_023896002.2	-
1	NC_056623.1	160129001	160130000	1000	*	0.000250818	0.0118915	26.977		-56862	XM_023873922.2	-
1	NC_056623.1	161945001	161946000	1000	*	8.09832e-05	0.00532846	-25.6563		7273	XM_023905327.2	-
1	NC_056623.1	177093001	177094000	1000	*	4.09176e-21	1.05778e-17	-61.7293	PDMR	0	XM_042895645.1	+	PREDICTED: Lactuca sativa exportin-7-A (LOC111881709), transcript variant X13, mRNA	Binds cargo molecules in the nuclei and transport them through nuclear pores to the cytoplasm, a process that requires RanGTP.Exportin 4 and 7 (also known as RanBP16) proteins that mediate the nuclear export of proteins with broad substrate specificity
1	NC_056623.1	181976001	181977000	1000	*	4.42926e-16	6.21584e-13	-58.9059	PDMR	0	NA	-
1	NC_056623.1	184454001	184455000	1000	*	1.17212e-15	1.57731e-12	-27.7661		0	XM_042895690.1	+
1	NC_056623.1	192020001	192021000	1000	*	7.3361e-09	2.4765e-06	36.1744		1253	XM_042900773.1	-
1	NC_056623.1	197745001	197746000	1000	*	3.38871e-05	0.0028259	32.4706		-195379	XM_023878420.2	+
1	NC_056623.1	210028001	210029000	1000	*	0.0017074	0.0418063	25.6303		-90702	XM_023914796.1	+
2	NC_056624.1	3188001	3189000	1000	*	1.24941e-18	2.40658e-15	-48		3763	NA	-
2	NC_056624.1	3255001	3256000	1000	*	1.82745e-06	0.000282708	-27.027		-28586	XM_023883795.2	-
2	NC_056624.1	12671001	12672000	1000	*	0.000303648	0.0134763	-25.3519		-22548	XR_002849565.2	+
2	NC_056624.1	12910001	12911000	1000	*	6.76023e-12	4.70987e-09	-52.6316	PDMR	-23763	XM_023885673.2	-	PREDICTED: Lactuca sativa F-box protein SKIP23 (LOC111889523), mRNA	This domain can be found in KIB3 from Arabidopsis. KIB3 is a F-box E3 ubiquitin ligase that promotes the degradation of GSK3-like kinase BIN2 while blocking its substrate access.The F-box Protein KIB1 Mediates Brassinosteroid-Induced Inactivation and Degradation of GSK3-like Kinases in Arabidopsis.
2	NC_056624.1	15544001	15545000	1000	*	7.60177e-09	2.5574e-06	-27.6923		40247	XM_023875319.2	+
2	NC_056624.1	20084001	20085000	1000	*	1.79831e-08	5.46927e-06	54.3383	PDMR	-192	XM_023913296.2	+	PREDICTED: Lactuca sativa F-box protein At4g19940 (LOC111917627), mRNA	A large family of plant domains, with several hundred members in Arabidopsis. Most examples are found C-terminal to an F-box, a 60 amino acid motif involved in ubiquitination of target proteins to mark them for degradation.most them are interchangeable F-box subunits of SCF E3 complexes. Some members have two copies of this domain
2	NC_056624.1	21118001	21119000	1000	*	7.25686e-05	0.00493683	42.5		2018	XM_042899019.1	-
2	NC_056624.1	49381001	49382000	1000	*	5.01808e-10	2.21055e-07	-58.5973	PDMR	4128	XM_023902970.2	-	PREDICTED: Lactuca sativa replication protein A 70 kDa DNA-binding subunit B-like (LOC111907170), mRNA	RPA70, RPA1 is the large subunit of Replication protein A. the ssDNA-binding protein (SSB) which appears to be involved in all aspects of DNA metabolism including replication, recombination, and repair.The ssDNA-binding mechanism is believed to be multistep and to involve conformational change.
2	NC_056624.1	49402001	49403000	1000	*	6.75836e-05	0.00467871	-27.0852		-4	XR_002855429.2	-
2	NC_056624.1	57853001	57854000	1000	*	2.73826e-07	5.74771e-05	32.0969		-38360	XM_023893450.1	+
2	NC_056624.1	60672001	60673000	1000	*	0.000234329	0.011334	30.6061		-93082	XM_042899684.1	-
2	NC_056624.1	79714001	79715000	1000	*	9.49707e-06	0.00105061	36		49030	XR_006188006.1	-
2	NC_056624.1	85789001	85790000	1000	*	3.35118e-11	1.98316e-08	-33.877		0	XM_023895882.1	-
2	NC_056624.1	87994001	87995000	1000	*	3.1582e-11	1.88028e-08	29.092		1476	XM_023890221.2	-
2	NC_056624.1	89722001	89723000	1000	*	3.11567e-05	0.0026408	-28.6114		0	XM_023901625.2	-
2	NC_056624.1	96952001	96953000	1000	*	0.000114129	0.00692066	-25.2316		26406	XM_042899698.1	+
2	NC_056624.1	98026001	98027000	1000	*	7.92126e-06	0.000920883	-35.0207		1015	XM_042899147.1	+
2	NC_056624.1	101248001	101249000	1000	*	0.000150525	0.00840448	-27.3983		-387	XM_023889957.2	+
2	NC_056624.1	104773001	104774000	1000	*	0.000210962	0.0105465	-36.9697		-195466	XM_023900824.2	+
2	NC_056624.1	107446001	107447000	1000	*	4.33725e-11	2.5063e-08	-51.7857	PDMR	20222	XM_023900813.2	+	PREDICTED: Lactuca sativa UDP-glycosyltransferase 75C1 (LOC111905141), mRNA	UGT, a member of the glycosyltransferase 28 family, resulting in the biosynthesis of sterol glucosidea member of the glycosyltransferase 28 family, resulting in the biosynthesis of sterol glucoside. theyare enzymes that catalyzes the addition of the glycosyl group from a UTP-sugar to a small hydrophobic molecul.
2	NC_056624.1	108744001	108745000	1000	*	5.62404e-18	9.52549e-15	-42.0869		134	XM_023883969.2	-
2	NC_056624.1	109462001	109463000	1000	*	2.97989e-06	0.000421801	38.733		0	XM_023884097.2	+
2	NC_056624.1	109510001	109511000	1000	*	1.20773e-05	0.00125148	42.3721		27390	XM_023884548.1	-
2	NC_056624.1	109669001	109670000	1000	*	8.12258e-18	1.32987e-14	59.9569	PDMR	-7919	XM_023884111.2	+	PREDICTED: Lactuca sativa probably inactive leucine-rich repeat receptor-like protein kinase At3g28040 (LOC111887980), mRNA	Pseudomonas secrete effector proteins such as TypeIII HopAB effector into the host plant to inhibit its immune system and facilitate the spread of the pathogen; suppresses host basal defenses by interfering with PAMP (pathogen-associated molecular signature)-triggered immunity (PTI) through binding and inhibiting BAK1, a kinase which serves to activate defense signaling. It also recognizes the ki…
2	NC_056624.1	115215001	115216000	1000	*	4.32288e-05	0.00338104	38.9192		-2079	XM_023894541.1	+
2	NC_056624.1	124982001	124983000	1000	*	3.74107e-13	3.09439e-10	-45.2096		322	XM_023889263.2	+
2	NC_056624.1	128672001	128673000	1000	*	0.000392369	0.0159935	-33.1912		-1727	XM_023883968.2	-
2	NC_056624.1	144164001	144165000	1000	*	7.11897e-11	3.90689e-08	43.3333		2456	XR_002858368.2	+
2	NC_056624.1	144254001	144255000	1000	*	4.47908e-14	4.40003e-11	27.5757		59145	XM_042899229.1	-
2	NC_056624.1	145960001	145961000	1000	*	9.90226e-09	3.2425e-06	36.4374		14086	XM_023911608.2	-
2	NC_056624.1	146002001	146003000	1000	*	5.60689e-05	0.00411347	37.3012		-516	XM_023911607.2	-
2	NC_056624.1	146600001	146601000	1000	*	3.79553e-09	1.36082e-06	-49.0029		-36493	XM_023911662.2	+
2	NC_056624.1	148396001	148397000	1000	*	9.48446e-09	3.11608e-06	26.2602		6433	XR_006188803.1	-
2	NC_056624.1	154333001	154334000	1000	*	0.000103028	0.00640282	29.9301		-12696	XM_023904071.2	-
2	NC_056624.1	171962001	171963000	1000	*	2.87932e-15	3.62629e-12	28.2895		0	XM_023885012.2	-
2	NC_056624.1	172403001	172404000	1000	*	5.53012e-07	0.000105486	43.2065		533	XM_023884721.2	+
2	NC_056624.1	179830001	179831000	1000	*	4.54208e-07	8.94171e-05	-35.6307		-6078	XM_023895665.2	-
2	NC_056624.1	191539001	191540000	1000	*	1.44302e-05	0.00144061	-33.701		-1809	XM_023878883.2	+
2	NC_056624.1	191616001	191617000	1000	*	9.83042e-06	0.00107899	-49.085		0	XM_023878880.2	-
2	NC_056624.1	193242001	193243000	1000	*	3.05945e-09	1.14712e-06	51.3682	PDMR	-15653	XM_023884459.2	-	PREDICTED: Lactuca sativa uncharacterized LOC111888301 (LOC111888301), mRNA
2	NC_056624.1	193659001	193660000	1000	*	3.50281e-09	1.28848e-06	43.8596		19371	XM_042899783.1	-
2	NC_056624.1	196145001	196146000	1000	*	0.00048458	0.0184865	27.8014		-13034	XR_002857111.2	+
2	NC_056624.1	197334001	197335000	1000	*	1.08373e-06	0.000182607	-36.4865		30568	XM_023906437.1	+
2	NC_056624.1	199955001	199956000	1000	*	4.74044e-05	0.00362678	36.7778		2062	XM_023874076.2	+
2	NC_056624.1	204933001	204934000	1000	*	1.66562e-19	3.63606e-16	60.0126	PDMR	0	XM_023880351.2	+	PREDICTED: Lactuca sativa reticulon-like protein B16 (LOC111884021), transcript variant X2, mRNA	Reticulon-like proteins from plants.likely association with the rough as well as the smooth ER, the reticulons might play some role in transport processes or in regulation of intracellular calcium levels. It has been suggested that the reticulons may be serving as ER-associated channel-like complexes
2	NC_056624.1	209178001	209179000	1000	*	0.000114321	0.00692423	-35.1052		18200	XM_023899043.2	-
2	NC_056624.1	209329001	209330000	1000	*	1.43595e-09	5.71096e-07	53.4459	PDMR	2208	XM_023899059.2	-	PREDICTED: Lactuca sativa putative zinc finger A20 and AN1 domain-containing stress-associated protein 8 (LOC111903282), mRNA	The AN1 zinc finger domain is also found in proteins containing a ubiquitin-like domain, which are involved in the ubiquitination pathway. The hsp70 chaperone machine performs many diverse roles in the cell, including folding of nascent proteins, translocation of polypeptides across organelle membranes, coordinating responses to stress,
2	NC_056624.1	211219001	211220000	1000	*	6.03587e-07	0.000113372	-32.0751		228	XM_042899807.1	-
3	NC_056625.1	8890001	8891000	1000	*	6.28863e-06	0.000767409	-27.988		-1910	XM_023916373.2	-
3	NC_056625.1	11897001	11898000	1000	*	0.000362054	0.0151799	-29.3121		25332	XM_023882787.2	+
3	NC_056625.1	13658001	13659000	1000	*	5.27954e-07	0.000101099	26.8084		787	XM_023882785.2	-
3	NC_056625.1	15384001	15385000	1000	*	9.96669e-06	0.00109029	29.4933		-11347	XM_023890342.2	+
3	NC_056625.1	17054001	17055000	1000	*	2.81776e-05	0.0024464	36.8298		12788	XM_023889841.2	+
3	NC_056625.1	23026001	23027000	1000	*	8.29574e-08	2.04244e-05	-30.1507		2166	NA	-
3	NC_056625.1	24004001	24005000	1000	*	0.000382165	0.0157245	-27.8927		-43994	XM_023880458.2	-
3	NC_056625.1	34438001	34439000	1000	*	0.00059938	0.0212028	-29.8186		30496	XM_023912851.2	+
3	NC_056625.1	35694001	35695000	1000	*	2.10672e-17	3.23366e-14	58.5366	PDMR	-520	XM_023900930.1	-	PREDICTED: Lactuca sativa F-box/LRR-repeat protein At1g55660-like (LOC111905239), mRNA	The F-box subunit of the SCF E3 complex is encoded by a diverse superfamily of genes in Arabidopsis
3	NC_056625.1	35703001	35704000	1000	*	0.000713575	0.023754	28.5714		-9520	XM_023900930.1	-
3	NC_056625.1	37017001	37018000	1000	*	6.45493e-07	0.000119797	36.0837		2106	XM_023892721.2	+
3	NC_056625.1	37750001	37751000	1000	*	1.16001e-22	3.79846e-19	85.528	PDMR	-1333	XM_023877953.2	+	PREDICTED: Lactuca sativa ATP-citrate synthase alpha chain protein 2 (LOC111881557), transcript variant X1, mRNA	Pyruvate carboxylase and Transcarboxylase 5S, carboxyltransferase domain, COA,Transcarboxylase 5S is a cobalt-dependent metalloenzyme subunit of the biot .Pyruvate carboxylase, like TC, is a biotin-dependent enzyme that catalyzes the carboxylation of pyruvate to produce oxaloacetate
3	NC_056625.1	42509001	42510000	1000	*	1.2511e-07	2.93813e-05	-28		-4222	XM_023908084.2	+
3	NC_056625.1	42513001	42514000	1000	*	0.000512415	0.019096	-35.8242		-222	XM_023908084.2	+
3	NC_056625.1	48175001	48176000	1000	*	2.47471e-22	6.94582e-19	47.4436		-20	XR_002857796.2	-
3	NC_056625.1	49982001	49983000	1000	*	7.06176e-10	3.02931e-07	37.1313		-39437	XM_023910177.2	+
3	NC_056625.1	53742001	53743000	1000	*	9.52671e-14	9.08599e-11	-71.4286	PDMR	6147	XM_023880917.2	-	PREDICTED: Lactuca sativa G-type lectin S-receptor-like serine/threonine-protein kinase At2g19130 (LOC111884614), mRNA	Transmembrane signal receptor,serine/threonine-protein kinase (26 Lettuce gene IDs )
3	NC_056625.1	54408001	54409000	1000	*	1.40005e-30	1.25031e-26	57.5968	PDMR	-45493	XM_023886246.2	-	PREDICTED: Lactuca sativa G-type lectin S-receptor-like serine/threonine-protein kinase At4g27290 (LOC111890093), mRNA	Plant S-receptor kinase-like genes have diverse functions in cell signalling, development, stress responses and host-pathogen defence responses. It contains receptor-like kinases, including S-locus receptor kinase (SRK). SRK is the female determinant of the self-incompatibility (SI) response in Brassica. A. thaliana, are reported to possibly have overlapping roles in both defence and development.
3	NC_056625.1	56509001	56510000	1000	*	1.28943e-11	8.38855e-09	51.5152	PDMR	27532	XM_023900132.2	+	PREDICTED: Lactuca sativa bifunctional protein FolD 2 (LOC111904361), transcript variant X2, mRNA ***	Enzymes that participate in the transfer of one-carbon units require the coenzyme tetrahydrofolate (THF). Various reactions generate one-carbon derivatives of THF, which can be interconverted between different oxidation states by methylene-THF dehydrogenase, methenyl-THF cyclohydrolase and and formyl-THF synthetase
3	NC_056625.1	60258001	60259000	1000	*	1.65045e-15	2.13331e-12	26.215		5251	XM_023880611.2	-
3	NC_056625.1	63281001	63282000	1000	*	0.00139301	0.036793	-26.3662		1829	XR_006189204.1	-
3	NC_056625.1	67391001	67392000	1000	*	3.43777e-10	1.58549e-07	-55.472	PDMR	4492	XM_023875558.1	-	PREDICTED: Lactuca sativa uncharacterized LOC111879081 (LOC111879081), mRNA
3	NC_056625.1	73530001	73531000	1000	*	6.85394e-07	0.00012585	36.3491		327	XM_023903391.2	-
3	NC_056625.1	90094001	90095000	1000	*	4.66866e-06	0.000607575	27.668		-37409	XM_023891879.2	-
3	NC_056625.1	101786001	101787000	1000	*	3.58258e-31	3.51935e-27	81.4939	PDMR	1646	XR_002852256.2	-	PREDICTED: Lactuca sativa uncharacterized LOC111897436 (LOC111897436), ncRNA
3	NC_056625.1	111787001	111788000	1000	*	1.45645e-14	1.64454e-11	-51.776	PDMR	4991	XM_023915189.2	-	PREDICTED: Lactuca sativa uncharacterized protein DDB_G0275933 (LOC111919624), mRNA	It's Coiled coil-helix-coiled coil-helix (CHCH) domain. A strong link exists between twin CX(9)C proteins and mitochondrial metabolism. performed in the mitochondrial inter-membrane space (IMS), and which include being part of protein complexes, participating in cytochrome c oxidase (COX) assembly, and maintaining mitochondrial structure. The functions of most twin CX(9)C proteins vary around the…
3	NC_056625.1	116728001	116729000	1000	*	1.40184e-12	1.06752e-09	28.6388		-635	XM_023912159.2	+
3	NC_056625.1	127799001	127800000	1000	*	1.03719e-06	0.000176889	-35.6938		-184444	NA	-
3	NC_056625.1	130421001	130422000	1000	*	1.04101e-05	0.00112377	30.9309		43424	XM_023876662.2	-
3	NC_056625.1	135436001	135437000	1000	*	5.91466e-45	1.93676e-40	56.1712	PDMR	186502	XM_023881944.1	+	PREDICTED: Lactuca sativa uncharacterized LOC111885700 (LOC111885700), mRNA
3	NC_056625.1	139631001	139632000	1000	*	3.06136e-05	0.00261053	-30.6723		-181114	XM_023884658.2	+
3	NC_056625.1	140257001	140258000	1000	*	0.000244677	0.0116849	36.4035		-1453	XM_023874348.1	+
3	NC_056625.1	145396001	145397000	1000	*	1.05144e-05	0.00112884	-27.2727		147176	XM_023909783.1	-
3	NC_056625.1	146133001	146134000	1000	*	0.000742125	0.024423	-27.5121		70411	XM_042900698.1	-
3	NC_056625.1	154552001	154553000	1000	*	1.03392e-06	0.000176755	36.0353		13913	XM_023876603.1	+
3	NC_056625.1	160451001	160452000	1000	*	1.95119e-10	9.58378e-08	33.3333		-90693	XM_023881564.2	-
3	NC_056625.1	165731001	165732000	1000	*	4.52224e-05	0.00348868	25.5556		-35365	XM_023905332.2	-
3	NC_056625.1	166074001	166075000	1000	*	2.9532e-07	6.14636e-05	38.1436		1988	XR_002856218.2	-
3	NC_056625.1	167124001	167125000	1000	*	1.13625e-08	3.63582e-06	-50	PDMR	12296	XM_023914244.2	+	PREDICTED: Lactuca sativa 5'-3' exoribonuclease 3 (LOC111918599), mRNA	5'-3'-exoribonucleases are enzymes that degrade RNA by removing terminal nucleotides from the 5' end. concomitant loss of 5'-3'-exoribonucleases and the mRNa cap binding cpmplex in arabidopsis, resulting plants manifesting myriad developmental defects.
3	NC_056625.1	172330001	172331000	1000	*	3.10447e-10	1.46619e-07	32		5178	XM_023891044.2	+
3	NC_056625.1	173399001	173400000	1000	*	4.97187e-07	9.61442e-05	-29.798		19666	XM_023917356.2	+
3	NC_056625.1	175147001	175148000	1000	*	2.19299e-06	0.000328398	-39.8443		632	XM_023893513.2	+
3	NC_056625.1	178098001	178099000	1000	*	0.000746714	0.0245292	26.8503		27825	XM_023904735.2	-
3	NC_056625.1	195328001	195329000	1000	*	7.70599e-21	1.94102e-17	-29.4441		-346	NA	-
3	NC_056625.1	204401001	204402000	1000	*	1.20889e-10	6.3168e-08	26.9663		-64389	XM_023884045.2	-
3	NC_056625.1	206040001	206041000	1000	*	2.26185e-06	0.000335639	-35.7143		33787	XM_023910739.2	+
3	NC_056625.1	206245001	206246000	1000	*	0.00103591	0.0303013	27.8097		8591	XM_023884192.2	-
3	NC_056625.1	214352001	214353000	1000	*	3.59444e-06	0.000492807	40.4762		109520	XM_023885462.2	-
3	NC_056625.1	216767001	216768000	1000	*	3.63304e-08	9.80474e-06	-50.5312	PDMR	56261	XM_023885690.1	+	PREDICTED: Lactuca sativa 16.9 kDa class I heat shock protein 1 (LOC111889545), mRNA	Arobidopsis heat shock factor-binding protein (HSBP) is required for acquired thermotolerance but not basal thermotolerance and for seed development. Heat shock factor binding protein interacts with the oligomerization domain of heat shock factor, suppressing transcriptional activity following stress. it was identifying a new allergenic proteins from wheat for bakers.
3	NC_056625.1	217439001	217440000	1000	*	4.48078e-07	8.83876e-05	31.8408		-39997	XM_023913339.2	+
3	NC_056625.1	223859001	223860000	1000	*	0.000491605	0.0186654	29.7323		-481	XM_023883986.2	-
3	NC_056625.1	228533001	228534000	1000	*	1.11961e-08	3.59429e-06	-50.5114	PDMR	-133195	XM_023881177.2	+	PREDICTED: Lactuca sativa hydroquinone glucosyltransferase (LOC111884882), mRNA	Hydroquinone is the most effective acceptor, but over 40 phenolic compounds are also glucosylated, but at lower rates. glucosyltransferase catalyzes the addition of the first residue, glucose to Hydroquinone
3	NC_056625.1	230474001	230475000	1000	*	7.24685e-10	3.06851e-07	-43.92		-40923	XM_023891229.2	+
3	NC_056625.1	230844001	230845000	1000	*	9.86284e-05	0.00618301	-26.8617		-140879	XR_002853286.2	-
3	NC_056625.1	246310001	246311000	1000	*	2.40757e-27	1.39123e-23	42.5398		-24571	XM_023873694.1	-
3	NC_056625.1	255974001	255975000	1000	*	1.61872e-06	0.000257724	42.0513		192	XM_023872538.1	+
4	NC_056626.1	5117001	5118000	1000	*	8.08877e-06	0.000930566	31.5068		3256	XM_023889502.2	-
4	NC_056626.1	20258001	20259000	1000	*	2.02061e-07	4.51125e-05	-33.4014		-4422	XR_002849850.2	-
4	NC_056626.1	22159001	22160000	1000	*	2.24938e-28	1.47312e-24	-72.4603	PDMR	443	XM_023878410.2	-	PREDICTED: Lactuca sativa vacuolar-sorting protein BRO1 (LOC111882040), mRNA	Vesicular trafficking pathways sort transmembrane proteins and lipids into small vesicles that invaginate into the endosome. Endosomes coordinate the transport of endocytic, biosynthetic and recycling cargoes.
4	NC_056626.1	30014001	30015000	1000	*	0.000397069	0.0161449	-26.8398		1240	XM_023892480.2	-
4	NC_056626.1	31607001	31608000	1000	*	5.05009e-20	1.18118e-16	-27.2911		0	XM_042901822.1	+
4	NC_056626.1	32419001	32420000	1000	*	9.93159e-05	0.00621421	-26.6046		163040	XM_042901579.1	+
4	NC_056626.1	38412001	38413000	1000	*	6.36213e-05	0.00449306	-25.8974		34742	XR_002859020.2	+
4	NC_056626.1	43249001	43250000	1000	*	3.10733e-08	8.5744e-06	44.902		109	NA	+
4	NC_056626.1	48008001	48009000	1000	*	4.8931e-09	1.72285e-06	38.2121		7	XM_023873376.1	-
4	NC_056626.1	48389001	48390000	1000	*	0.000160415	0.00880355	30.5		-435	XM_023873334.2	+
4	NC_056626.1	56393001	56394000	1000	*	2.37101e-13	2.11742e-10	44.3842		0	XM_023874973.2	-
4	NC_056626.1	58013001	58014000	1000	*	1.2966e-05	0.00132679	25.6021		71069	XM_023894444.1	-
4	NC_056626.1	59820001	59821000	1000	*	8.10345e-06	0.000930566	45.4342		8066	XM_023881878.1	+
4	NC_056626.1	61577001	61578000	1000	*	2.51633e-23	8.82829e-20	44.1892		0	XR_002846307.2	+
4	NC_056626.1	62466001	62467000	1000	*	2.53409e-13	2.24267e-10	-47.5254		-31764	XM_023876394.2	+
4	NC_056626.1	63362001	63363000	1000	*	0.000426709	0.0169297	-26.7574		-14646	XM_023902773.2	-
4	NC_056626.1	64152001	64153000	1000	*	1.82827e-10	9.11677e-08	63.4058	PDMR	1722	XM_023903520.1	+	PREDICTED: Lactuca sativa uncharacterized LOC111907714 (LOC111907714), mRNA
4	NC_056626.1	69801001	69802000	1000	*	7.64181e-05	0.00512769	-34.245		-21169	XR_002848585.1	-
4	NC_056626.1	75635001	75636000	1000	*	8.96354e-18	1.4435e-14	-29.6541		0	XR_006191286.1	-
4	NC_056626.1	77310001	77311000	1000	*	3.4399e-08	9.35805e-06	-64.3404	PDMR	9187	XR_002851394.1	+	PREDICTED: Lactuca sativa small nucleolar RNA R71 (LOC111895005), ncRNA	Sialidases (neuraminidases) hydrolyse the non-reducing, terminal sialic acid linkage in various natural substrates, glycoproteins, glycolipids, gangliosides, and polysaccharides. sialidase forms part of the multi-functional haemagglutinin-sialidase glycoprotein found on the viral envelope, pathogenesis of many diseases (pathogens)
4	NC_056626.1	85440001	85441000	1000	*	2.44045e-05	0.0021854	47.6875		2423	XM_023888457.2	-
4	NC_056626.1	91413001	91414000	1000	*	2.1753e-07	4.81286e-05	47.7298		5710	XR_006190575.1	+
4	NC_056626.1	102806001	102807000	1000	*	3.67131e-05	0.00300293	-32.1154		1590	XM_023895753.2	-
4	NC_056626.1	109866001	109867000	1000	*	0.000575569	0.0206129	-27.9817		0	XM_023895518.2	+
4	NC_056626.1	111282001	111283000	1000	*	0.00081272	0.0258793	26.3889		-1954	XR_006191323.1	+
4	NC_056626.1	113730001	113731000	1000	*	7.74202e-08	1.91571e-05	32.0755		3926	XM_023895472.2	+
4	NC_056626.1	117236001	117237000	1000	*	1.9964e-15	2.54696e-12	-31.746		0	XM_023874429.2	+
4	NC_056626.1	118059001	118060000	1000	*	0.00144209	0.0376065	26.2626		8346	XM_023874441.2	+
4	NC_056626.1	119906001	119907000	1000	*	1.62049e-45	7.95945e-41	79.2656	PDMR	-20811	XM_023887751.2	-	PREDICTED: Lactuca sativa E3 ubiquitin-protein ligase BOI (LOC111891681), mRNA	E3 ubiquitin-protein ligases related to BOI (Botrytis Susceptible1 Interactor) involved in the regulation of pathogen and abiotic stress responses ; This entry also includes some uncharacterised RING finger proteins
4	NC_056626.1	120099001	120100000	1000	*	0.000991605	0.0295978	29.1667		21443	XM_023907539.2	+
4	NC_056626.1	120160001	120161000	1000	*	6.25682e-06	0.000765429	-25.6823		-79085	XM_023907534.1	+
4	NC_056626.1	121283001	121284000	1000	*	5.45376e-08	1.41733e-05	-36.4634		4422	XM_023902806.2	-
4	NC_056626.1	124399001	124400000	1000	*	7.04146e-19	1.38344e-15	-81.5789	PDMR	-445	XM_023894600.2	-	PREDICTED: Lactuca sativa BTB/POZ and TAZ domain-containing protein 1 (LOC111898732), mRNA	This group are scaffold proteins that play roles in both male and female gametophyte development . BT2 can activate telomerase expression in mature Arabidopsis leaves. It mediates multiple responses to nutrients, stresses, and hormones in Arabidopsis.BT1 is a short-lived protein. that is characteristically targeted for degradation by the 26S proteasomeregulation of DNA-templated transcription, po…
4	NC_056626.1	124589001	124590000	1000	*	9.39743e-09	3.09785e-06	31.4939		0	XM_023900367.2	+
4	NC_056626.1	126985001	126986000	1000	*	8.61688e-06	0.000971849	-26.3158		860	XM_023910920.1	-
4	NC_056626.1	164317001	164318000	1000	*	3.31846e-05	0.00277202	25.6881		-13021	XM_023873620.2	+
4	NC_056626.1	182216001	182217000	1000	*	9.62274e-05	0.00605568	-42.5386		-1384	XR_006191385.1	-
4	NC_056626.1	191349001	191350000	1000	*	0.000928831	0.028363	26.3093		-330	XM_023885148.1	+
4	NC_056626.1	226165001	226166000	1000	*	3.50565e-08	9.487e-06	29.4118		13922	XM_023894688.2	-
4	NC_056626.1	226420001	226421000	1000	*	2.81209e-11	1.70522e-08	59.5455	PDMR	-516	XM_042901332.1	+	PREDICTED: Lactuca sativa serine carboxypeptidase 1 (LOC111921913), transcript variant X2, mRNA	SCP46 is dominantly expressed in developing seeds, particularly in embryo, endosperm and aleurone layers, and could be induced by ABA. The enzyme A-sensitive LD-carboxypeptidase enzyme from Escherichia coli playing a general vital role is for the synthesis of a functioning murein. A defect in cell wall recycling triggers autolysis during the stationary growth phase of Escherichia coli. LD-carboxy…
4	NC_056626.1	252140001	252141000	1000	*	0.000209588	0.0105046	35.5072		404	XM_023917499.2	-
4	NC_056626.1	254510001	254511000	1000	*	2.09992e-08	6.17621e-06	-57.3401	PDMR	-140796	XR_002849265.1	-	PREDICTED: Lactuca sativa small nucleolar RNA R71 (LOC111888620), ncRNA Multicopies?	Sialidases (neuraminidases) hydrolyse the non-reducing, terminal sialic acid linkage in various natural substrates, glycoproteins, glycolipids, gangliosides, and polysaccharides. sialidase forms part of the multi-functional haemagglutinin-sialidase glycoprotein found on the viral envelope, pathogenesis of many diseases (pathogens)
4	NC_056626.1	273259001	273260000	1000	*	0.000892137	0.0275508	25.1659		-48440	XR_002847273.1	-
4	NC_056626.1	281071001	281072000	1000	*	2.16792e-05	0.00197924	-25.7576		-1984	XM_023906566.2	-
4	NC_056626.1	283759001	283760000	1000	*	1.27739e-06	0.000211254	25.0138		54755	XM_042901742.1	-
4	NC_056626.1	284722001	284723000	1000	*	1.02157e-06	0.000175138	40.8312		32492	XM_023912661.2	-
4	NC_056626.1	296767001	296768000	1000	*	1.40727e-18	2.65853e-15	-37.8609		396	XM_042901749.1	+
4	NC_056626.1	298407001	298408000	1000	*	1.14143e-27	7.00805e-24	31.086		-107254	XR_002852812.1	+
4	NC_056626.1	318540001	318541000	1000	*	2.57767e-06	0.000374583	-34.0326		1890	XM_023906521.2	+
4	NC_056626.1	318950001	318951000	1000	*	3.23937e-12	2.39263e-09	-57.0139	PDMR	-87158	XM_023906518.2	-	PREDICTED: Lactuca sativa AP2-like ethylene-responsive transcription factor ANT (LOC111910687), mRNA	DNA-binding transcription factor activity, regulation of DNA-templated transcription
4	NC_056626.1	331923001	331924000	1000	*	7.09933e-11	3.90689e-08	-50.7184	PDMR	64434	XM_023905689.2	+	PREDICTED: Lactuca sativa RNA polymerase sigma factor sigE, chloroplastic/mitochondrial (LOC111909904), transcript variant X2, mRNA	A sigma factor is a protein needed for allbacteria for initiation of transcription. SigE encodes Sigma factors, which are are subunits RNA polymerases, responsible for determining the specificity of promoter DNA binding and control how efficiently RNA synthesis (transcription) is initiated. Aribdopsis contain as many as six sigma factors for the hundred or so of its chloroplast genes to function …
4	NC_056626.1	338721001	338722000	1000	*	7.96732e-06	0.000922961	-28.5714		34639	XM_023904759.2	+
4	NC_056626.1	340510001	340511000	1000	*	3.19528e-10	1.49471e-07	33.6066		0	XM_042901771.1	+
4	NC_056626.1	341210001	341211000	1000	*	8.38685e-07	0.000147385	30.1326		551	XM_042901494.1	+
4	NC_056626.1	343319001	343320000	1000	*	1.88369e-13	1.71338e-10	31.5925		0	XM_023890035.2	+
4	NC_056626.1	369915001	369916000	1000	*	3.95379e-10	1.79815e-07	-55.5	PDMR	10255	XR_006191091.1	+	PREDICTED: Lactuca sativa uncharacterized LOC111914065 (LOC111914065), ncRNA
4	NC_056626.1	372809001	372810000	1000	*	8.01502e-07	0.000142637	-30.6973		-16798	XM_023879394.1	-
4	NC_056626.1	373320001	373321000	1000	*	2.45025e-14	2.67445e-11	-60.7843	PDMR	-4387	XM_023879424.2	-	PREDICTED: Lactuca sativa uncharacterized LOC111883058 (LOC111883058), mRNA
5	NC_056627.1	12571001	12572000	1000	*	7.16496e-07	0.000130102	-43.2249		692	XM_023874620.2	+
5	NC_056627.1	16322001	16323000	1000	*	2.04268e-10	9.98324e-08	34.3333		7322	XM_023906384.2	-
5	NC_056627.1	20482001	20483000	1000	*	1.1828e-05	0.00123609	35.2381		18300	XM_042901993.1	-
5	NC_056627.1	27256001	27257000	1000	*	0.000128129	0.00750104	-34.9796		2585	XM_023886120.2	+
5	NC_056627.1	29494001	29495000	1000	*	7.59876e-05	0.00510927	-29.2097		-4488	XM_023883591.2	+
5	NC_056627.1	37489001	37490000	1000	*	0.000727916	0.0240727	43.8725		-347	XM_023876348.2	-
5	NC_056627.1	44338001	44339000	1000	*	4.60728e-12	3.27968e-09	50.9921	PDMR	611	XM_042902413.1	-	PREDICTED: Lactuca sativa SNF1-related protein kinase catalytic subunit alpha KIN10 (LOC111912177), transcript variant X2, mRNA	AKIN10 and AKIN11 function as central integrators of sugar, metabolic, stress, and developmental signals in plants.
5	NC_056627.1	44813001	44814000	1000	*	2.45656e-07	5.29212e-05	33.3333		3947	XM_023879607.2	+
5	NC_056627.1	58424001	58425000	1000	*	0.000784996	0.0253082	33.3333		22277	XR_006192225.1	+
5	NC_056627.1	69310001	69311000	1000	*	2.84562e-11	1.71497e-08	39.7969		-4985	XM_042902470.1	+
5	NC_056627.1	83729001	83730000	1000	*	0.000140251	0.00800861	-30.3134		-67007	XM_023890583.2	+
5	NC_056627.1	94515001	94516000	1000	*	2.52374e-14	2.7244e-11	-78.5714	PDMR	0	XM_023910838.1	-	PREDICTED: Lactuca sativa uncharacterized LOC111915161 (LOC111915161), mRNA
5	NC_056627.1	101016001	101017000	1000	*	0.000432504	0.0170974	26.4151		106791	XM_023914797.1	-
5	NC_056627.1	111207001	111208000	1000	*	6.41843e-05	0.00451983	32.0446		-46440	XM_023883439.2	+
5	NC_056627.1	115423001	115424000	1000	*	1.24782e-12	9.57656e-10	-57.7778	PDMR	15060	XM_023902064.2	+	PREDICTED: Lactuca sativa bifunctional 3-dehydroquinate dehydratase/shikimate dehydrogenase, chloroplastic (LOC111906236), transcript variant X2, mRNA	Bifunctional 3-dehydroquinate dehydratase,Bacteria genomes of the enzymes of the chorismate pathways both up- and downstream of chorismate mutase. Shikimate dehydrogenase catalyses the fourth step of the mycobacterial Shikimate pathway, which results in the biosynthesis of chorismate. This pathway is an important target for antibacterial agents, especially against Mycobacterium tuberculosis, sinc…
5	NC_056627.1	115674001	115675000	1000	*	1.22603e-09	4.9975e-07	42.7211		266060	XM_023902064.2	+
5	NC_056627.1	122156001	122157000	1000	*	5.75543e-14	5.54299e-11	63.0592	PDMR	4668	XM_023904477.2	-	PREDICTED: Lactuca sativa probable histone-arginine methyltransferase 1.3 (LOC111908665), mRNA	Histone-arginine methyltransferase CARM1 (also known as coactivator-associated arginine methyltransferase 1) methylates arginine residues in several proteins involved in DNA packaging, transcription regulation, and mRNA stability , CARM1 is recruited by several transcription factors and plays a critical role in gene expression as a positive regulator. This entry represents the N-terminal domain o…
5	NC_056627.1	124281001	124282000	1000	*	0.00128995	0.035102	-25.7576		-252	XM_042902236.1	-
5	NC_056627.1	126284001	126285000	1000	*	2.91638e-24	1.19371e-20	73.2825	PDMR	-65596	XM_023916182.2	-	PREDICTED: Lactuca sativa putative cyclic nucleotide-gated ion channel 7 (LOC111920606), transcript variant X1, mRNA	cAMP/cGMP binding motif profile, Proteins that bind cyclic nucleotides (cAMP or cGMP) share a structural domain (the prokaryotic catabolite gene activator),as the cAMP receptor protein) (gene crp)
5	NC_056627.1	132323001	132324000	1000	*	8.53265e-12	5.70208e-09	-48.4689		-35889	XR_006191841.1	+
5	NC_056627.1	154915001	154916000	1000	*	0.00101348	0.0298707	28.3012		-455077	XM_023905831.2	+
5	NC_056627.1	156698001	156699000	1000	*	2.74495e-08	7.72639e-06	33.4392		-3358	XR_002846310.2	+
5	NC_056627.1	157988001	157989000	1000	*	2.39362e-05	0.00215328	25.5902		115090	XM_023912197.1	+
5	NC_056627.1	158476001	158477000	1000	*	5.84148e-34	6.37598e-30	-95.3846	PDMR	-3180	XM_023893572.2	-	PREDICTED: Lactuca sativa probable glucan 1,3-alpha-glucosidase (LOC111897613), mRNA	Cell division, trafficking of materials, plasmodesmata, tolerance of abiotic stresses, involved in flower formation to seed maturation
5	NC_056627.1	158963001	158964000	1000	*	0.00030139	0.0134276	33.3333		34784	XM_023893585.1	-
5	NC_056627.1	163354001	163355000	1000	*	1.20403e-05	0.00125148	-40.3226		1160	XM_023893146.1	+
5	NC_056627.1	172552001	172553000	1000	*	1.85538e-16	2.68034e-13	-48.4117		-160898	XR_002845060.2	-
5	NC_056627.1	175109001	175110000	1000	*	2.65148e-07	5.61356e-05	47.3046		473	XM_023873149.1	-
5	NC_056627.1	175375001	175376000	1000	*	6.37327e-10	2.7807e-07	-50.9804	PDMR	-4132	XR_006191881.1	-	PREDICTED: Lactuca sativa uncharacterized LOC122198058 (LOC122198058), ncRNA
5	NC_056627.1	177368001	177369000	1000	*	0.000341491	0.0145474	-29.9473		3165	XR_002846523.2	-
5	NC_056627.1	187804001	187805000	1000	*	6.64516e-08	1.69116e-05	39.767		-37810	XM_023909562.2	+
5	NC_056627.1	203562001	203563000	1000	*	1.52448e-09	5.99029e-07	47.5882		-6757	XM_023878229.2	-
5	NC_056627.1	210699001	210700000	1000	*	3.4768e-06	0.000481727	28.9123		-86673	XM_023917301.2	-
5	NC_056627.1	214292001	214293000	1000	*	8.95605e-05	0.00573782	41.7647		2315	XM_023893913.2	+
5	NC_056627.1	215564001	215565000	1000	*	0.000448159	0.0174841	-28.75		1255	XM_023893870.2	-
5	NC_056627.1	220040001	220041000	1000	*	0.00111512	0.0318814	-28.3699		-43382	XM_023904502.2	-
5	NC_056627.1	226822001	226823000	1000	*	0.000446976	0.0174449	33.1313		393	XR_002852945.2	-
5	NC_056627.1	228896001	228897000	1000	*	6.71444e-05	0.00466474	31.5789		-4547	XM_023908967.2	-
5	NC_056627.1	234882001	234883000	1000	*	8.34618e-21	2.04972e-17	49.0196		1539	XM_023873724.2	-
5	NC_056627.1	244030001	244031000	1000	*	2.33642e-13	2.10568e-10	39.5147		0	XR_002857172.2	+
5	NC_056627.1	244625001	244626000	1000	*	1.59825e-06	0.000255292	26.7296		-3392	XM_023908230.1	+
5	NC_056627.1	249492001	249493000	1000	*	2.09382e-05	0.0019241	36.5		47118	XR_002850860.2	-
5	NC_056627.1	257447001	257448000	1000	*	2.79957e-05	0.00243377	-37.8788		-75400	XM_023906015.2	-
5	NC_056627.1	258885001	258886000	1000	*	1.32102e-05	0.00134847	27.0345		1996	XM_023906263.1	+
5	NC_056627.1	258926001	258927000	1000	*	1.05543e-07	2.52264e-05	33.0867		11679	XM_023906264.1	-
5	NC_056627.1	266538001	266539000	1000	*	6.67335e-11	3.70371e-08	-57.6271	PDMR	542	XM_023906236.2	+	PREDICTED: Lactuca sativa uncharacterized LOC111910391 (LOC111910391), mRNA
5	NC_056627.1	268307001	268308000	1000	*	0.000127774	0.00748922	-29.9315		17722	XM_023888714.2	-
5	NC_056627.1	268520001	268521000	1000	*	2.98855e-13	2.57527e-10	33.7855		19868	XM_023888539.1	+
5	NC_056627.1	271118001	271119000	1000	*	1.40134e-09	5.64182e-07	35.3748		-3111	XR_002850584.2	-
5	NC_056627.1	280799001	280800000	1000	*	8.40399e-12	5.65457e-09	45.1233		0	XR_006192008.1	-
5	NC_056627.1	282859001	282860000	1000	*	4.27672e-09	1.52773e-06	64.7813	PDMR	405	XR_002849997.2	+	PREDICTED: Lactuca sativa uncharacterized LOC111890789 (LOC111890789), transcript variant X1, ncRNA
5	NC_056627.1	287199001	287200000	1000	*	6.72756e-05	0.00467055	37.5		5554	NA	-
5	NC_056627.1	288420001	288421000	1000	*	1.92755e-06	0.000296327	48.4848		788	XM_023887833.2	-
5	NC_056627.1	293268001	293269000	1000	*	7.89531e-09	2.64709e-06	-35.232		108	XM_023885553.2	+
5	NC_056627.1	295979001	295980000	1000	*	0.000682683	0.0230617	27.0833		36328	XR_002845712.1	+
5	NC_056627.1	300886001	300887000	1000	*	6.97047e-07	0.000127513	-45.4696		0	XR_002853494.2	+
5	NC_056627.1	318613001	318614000	1000	*	8.99383e-07	0.000156651	27.907		2218	XM_023875267.2	-
5	NC_056627.1	318617001	318618000	1000	*	3.51906e-09	1.28848e-06	-43.6907		-785	XM_023875267.2	-
5	NC_056627.1	319553001	319554000	1000	*	0.001037	0.0303185	-25.3846		17421	XR_006183677.1	-
5	NC_056627.1	320479001	320480000	1000	*	3.67201e-12	2.65235e-09	28.3827		19759	XR_006183745.1	+
5	NC_056627.1	326255001	326256000	1000	*	1.9849e-08	5.9087e-06	49.985		275	XM_023908285.2	+
5	NC_056627.1	329072001	329073000	1000	*	1.54877e-08	4.81466e-06	-29.276		0	NA	-
5	NC_056627.1	336600001	336601000	1000	*	7.24527e-08	1.81104e-05	29.1667		0	XM_023888444.2	-
5	NC_056627.1	338038001	338039000	1000	*	8.05789e-07	0.00014304	50.8306	PDMR	2493	XM_023913100.1	-	PREDICTED: Lactuca sativa uncharacterized LOC111917413 (LOC111917413), mRNA
6	NC_056628.1	6223001	6224000	1000	*	1.70448e-10	8.58665e-08	31.0345		-24897	XM_023909590.1	-
6	NC_056628.1	14232001	14233000	1000	*	4.94194e-15	6.0684e-12	28		-77	XM_023914419.2	-
6	NC_056628.1	14976001	14977000	1000	*	2.56572e-26	1.32655e-22	-78.9342	PDMR	0	XM_023908774.2	+	PREDICTED: Lactuca sativa protein Mpv17 (LOC111913049), mRNA	Closely related peroxisomal proteins required to maintain mitochondrial DNA (mtDNA) integrity and stability.
6	NC_056628.1	21865001	21866000	1000	*	1.25987e-09	5.11421e-07	-35.0557		0	NA	+
6	NC_056628.1	22937001	22938000	1000	*	5.63806e-05	0.0041312	30.3406		-2395	XM_023886549.1	+
6	NC_056628.1	23078001	23079000	1000	*	0.00197531	0.0458193	-25.9515		37069	XM_023886553.1	+
6	NC_056628.1	35071001	35072000	1000	*	9.03914e-09	2.98977e-06	-30.3706		37749	XM_023890249.2	-
6	NC_056628.1	43892001	43893000	1000	*	4.89393e-08	1.28889e-05	-28.8462		0	XM_023883619.2	-
6	NC_056628.1	51204001	51205000	1000	*	4.17703e-29	2.93094e-25	-65.882	PDMR	0	XM_023901027.2	-	PREDICTED: Lactuca sativa NADPH-dependent aldehyde reductase-like protein, chloroplastic (LOC111905330), mRNA	Oxidoreductase. An enzyme that introduces an electron into its substrate from an electron donor. The reaction is usually coupled with an oxidation reaction (10 lettuce gene IDs )
6	NC_056628.1	55491001	55492000	1000	*	4.71416e-09	1.67183e-06	33.7838		14626	XM_023892615.1	-
6	NC_056628.1	64816001	64817000	1000	*	1.88885e-22	5.79849e-19	66.9257	PDMR	-60666	XM_023873987.1	-	PREDICTED: Lactuca sativa glutathione S-transferase T3-like (LOC111877468), mRNA	Regulates the activity of target proteins through changes in the redox state of thiol groups processes include the ferredoxin/thioredoxin system, the NADP/thioredoxin system, and the glutathione/glutaredoxin system
6	NC_056628.1	66148001	66149000	1000	*	6.32345e-18	1.05286e-14	39.5062		136	XM_023873999.2	+
6	NC_056628.1	70005001	70006000	1000	*	2.10622e-07	4.6811e-05	-31.4297		-534	NA	+
6	NC_056628.1	75347001	75348000	1000	*	0.000750157	0.0246049	28.6667		-3676	XM_023899102.2	-
6	NC_056628.1	75790001	75791000	1000	*	9.22173e-05	0.00585962	36.446		404	XM_023899111.2	-
6	NC_056628.1	86420001	86421000	1000	*	0.00139329	0.036793	-29.1667		-813	XM_023891987.2	-
6	NC_056628.1	86602001	86603000	1000	*	2.0866e-11	1.29732e-08	43.5355		573	XM_023892000.1	-
6	NC_056628.1	88915001	88916000	1000	*	7.3086e-08	1.82224e-05	47.0289		-3544	XR_002851737.1	+
6	NC_056628.1	92728001	92729000	1000	*	6.31974e-15	7.57099e-12	-53.533	PDMR	226	NA	+
6	NC_056628.1	97948001	97949000	1000	*	1.65263e-08	5.07332e-06	33.4268		62492	XM_023903329.1	+
6	NC_056628.1	102428001	102429000	1000	*	4.14901e-14	4.15897e-11	-56.6653	PDMR	-54	XM_023889542.2	+	PREDICTED: Lactuca sativa protein IQ-DOMAIN 13 (LOC111893490), transcript variant X1, mRNA	Members of the IQ motif containing GTPase activating protein (IQGAP) family are associated with the Ras GTP-binding protein and act as essential regulators of cytoskeletal function. Arabidopsis contains the IQ motif IQM1-6. IQxxxRGxxxR, which is one of a few recognition motifs for CaM-binding protein. Besides one copy of IQ motif, they share domains related to pea heavy-metal induced protein 6A a…
6	NC_056628.1	103275001	103276000	1000	*	1.54975e-09	6.06534e-07	-44.1508		-20945	XM_023903933.2	-
6	NC_056628.1	121154001	121155000	1000	*	3.09495e-09	1.15602e-06	-55.8559	PDMR	-817	XM_042896134.1	+	PREDICTED: Lactuca sativa G-type lectin S-receptor-like serine/threonine-protein kinase At1g67520 (LOC111880441), mRNA	Lettuce 30 entries ,transmemberan signal receptors
6	NC_056628.1	124063001	124064000	1000	*	2.4904e-06	0.000363327	31.459		-28042	XM_023914814.2	-
6	NC_056628.1	127430001	127431000	1000	*	0.000589375	0.0209394	25.7325		-3828	XR_002851044.2	+
6	NC_056628.1	128697001	128698000	1000	*	4.479e-06	0.000588229	-39.234		8967	XR_006183960.1	+
6	NC_056628.1	133276001	133277000	1000	*	4.53334e-06	0.000594571	33.3333		0	XR_002858280.2	+
6	NC_056628.1	133574001	133575000	1000	*	6.20451e-06	0.000759976	-36.5937		-6560	XM_023886669.1	-
6	NC_056628.1	135897001	135898000	1000	*	2.73893e-14	2.86233e-11	58.3293	PDMR	-73599	XM_023886627.2	-	PREDICTED: Lactuca sativa transcription factor MYC2 (LOC111890524), mRNA	The family includes several bHLH transcription factors from Arabidopsis,(AIB and MYC proteins (MYC2, MYC3 and MYC4),MYC2, also termed protein jasmonate insensitive 1, or R-homologous Arabidopsis protein 1 (RAP-1), or AtbHLH6, or EN 38, or Z-box binding factor 1 protein, is a transcriptional activator involved in abscisic acid (ABA), jasmonic acid (JA), and light signaling pathways.MYC2, together …
6	NC_056628.1	140883001	140884000	1000	*	1.38981e-10	7.14805e-08	53.1025	PDMR	4254	XM_023886937.2	-	PREDICTED: Lactuca sativa SUMO-conjugating enzyme UBC9 (LOC111890857), mRNA	The small ubiquitin-related modifier SUMO-1 is a Ub/Ubl family member, and although SUMO-1 shares structural similarity to Ub, SUMO's cellular functions remain distinct insomuch as SUMO modification alters protein function through changes in activity, cellular localisation, or by protecting substrates from ubiquitination
6	NC_056628.1	141209001	141210000	1000	*	1.71114e-05	0.00164121	-28.125		-44594	XM_023886936.2	+
6	NC_056628.1	146028001	146029000	1000	*	0.000228114	0.0111376	41.6442		-11482	XR_002853425.2	+
6	NC_056628.1	150392001	150393000	1000	*	3.04653e-11	1.82485e-08	-55.5065	PDMR	-796	XM_023900134.2	+	PREDICTED: Lactuca sativa vacuolar-processing enzyme (LOC111904359), mRNA	Vacuolar Processing Enzymes homologues have been identified in plants, protozoa, vertebrates, and helminths. The proenzyme form legumain belongs to cysteine proteases. The mature active form of these proteins is generated by autoproteolytic maturation at acidic pH. It's cysteine proteases found in many organisms
6	NC_056628.1	155789001	155790000	1000	*	1.60423e-14	1.79081e-11	62.3188	PDMR	-740	NA	+
6	NC_056628.1	163916001	163917000	1000	*	1.865e-08	5.62389e-06	37.2895		-32712	NA	+
6	NC_056628.1	174872001	174873000	1000	*	9.4926e-11	5.06797e-08	32.8442		12711	XR_002852732.1	-
6	NC_056628.1	177628001	177629000	1000	*	2.0323e-05	0.00187988	43.4334		0	XM_023876068.2	+
6	NC_056628.1	181347001	181348000	1000	*	2.08832e-07	4.65184e-05	-43.317		2084	XM_023904595.1	-
7	NC_056629.1	224001	225000	1000	*	7.06688e-12	4.85466e-09	-30.4097		-71635	XM_023885131.2	-
7	NC_056629.1	6253001	6254000	1000	*	2.85564e-07	5.96861e-05	-35.1852		702	XM_023908614.2	+
7	NC_056629.1	7701001	7702000	1000	*	8.0413e-05	0.00530516	-48.062		168	XM_023903979.2	+
7	NC_056629.1	9819001	9820000	1000	*	2.3367e-07	5.09529e-05	41.328		3059	XM_023877780.2	-
7	NC_056629.1	18848001	18849000	1000	*	5.24229e-11	2.94273e-08	25.5348		-965	XM_023887054.2	+
7	NC_056629.1	21049001	21050000	1000	*	0.000360615	0.015131	-38.7978		0	XM_023887035.2	-
7	NC_056629.1	23327001	23328000	1000	*	1.75394e-07	3.97002e-05	54.3009	PDMR	-43240	XR_002855634.1	+	PREDICTED: Lactuca sativa small nucleolar RNA R71 (LOC111907660), ncRNA	Sialidases (neuraminidases) hydrolyse the non-reducing, terminal sialic acid linkage in various natural substrates, such as glycoproteins, glycolipids, gangliosides, and polysaccharides. In several paramyxoviruses, sialidase forms part of the multi-functional haemagglutinin-sialidase glycoprotein found on the viral envelope.
7	NC_056629.1	24518001	24519000	1000	*	1.02952e-16	1.50948e-13	59.8485	PDMR	0	XM_023902656.2	-	PREDICTED: Lactuca sativa probable serine/threonine-protein kinase abkC (LOC111906875), mRNA	STKs catalyze the transfer of the gamma-phosphoryl group from ATP to serine/threonine residues on protein substrates;Phosphotransferases; Poxvirus_ser/thr_kinase: This family of proteins contain poxvirus serine/threonine protein kinases, which are essential for phosphorylation of virion proteins during virion assembly; α-helical bundle domain found N-terminal to the protein kinase domain in micro…
7	NC_056629.1	25569001	25570000	1000	*	3.45778e-12	2.51612e-09	41.4634		0	XM_023902520.2	-
7	NC_056629.1	30218001	30219000	1000	*	4.26579e-08	1.13433e-05	27.8689		-13846	NA	+
7	NC_056629.1	30496001	30497000	1000	*	0.000246287	0.0117219	-39.4048		5093	XM_023888098.2	-
7	NC_056629.1	47457001	47458000	1000	*	5.15007e-09	1.79403e-06	29.2683		16500	XM_042896564.1	+
7	NC_056629.1	48751001	48752000	1000	*	4.98649e-16	6.80346e-13	-57.0851	PDMR	-3714	XM_023900750.2	-	PREDICTED: Lactuca sativa disease resistance protein RUN1 (LOC111905067), mRNA
7	NC_056629.1	52351001	52352000	1000	*	1.49064e-05	0.00147465	-32.8015		5001	XM_023874050.1	-
7	NC_056629.1	52409001	52410000	1000	*	1.34076e-07	3.10636e-05	29.3325		2929	XM_042896379.1	-
7	NC_056629.1	54349001	54350000	1000	*	1.06955e-25	5.00319e-22	-77.8686	PDMR	16800	XM_023880173.2	-	PREDICTED: Lactuca sativa phosphatidylglycerophosphate phosphatase PTPMT2 (LOC111883844), mRNA	Phosphatidylglycerophosphatase and protein-tyrosine phosphatase 1 (PTPMT1) regulates phospholipid biosynthesis; They are involved in root growth and columella cells organization (Arabidopsis)
7	NC_056629.1	57302001	57303000	1000	*	8.99102e-09	2.9839e-06	-46.2205		-6221	XM_023880257.2	+
7	NC_056629.1	58086001	58087000	1000	*	1.88396e-05	0.00177248	-28.5834		-39718	XM_023880090.1	+
7	NC_056629.1	60919001	60920000	1000	*	1.00931e-10	5.33064e-08	35.6322		585	XM_042896585.1	+
7	NC_056629.1	60949001	60950000	1000	*	6.74811e-13	5.43362e-10	-49.9609		-1472	NA	+
7	NC_056629.1	69493001	69494000	1000	*	0.00185946	0.0440647	-38.8889		-114	XM_023878042.2	+
7	NC_056629.1	92052001	92053000	1000	*	2.91637e-13	2.53531e-10	-61.8912	PDMR	396	XM_023894369.2	+	PREDICTED: Lactuca sativa mitogen-activated protein kinase 8 (LOC111898462), mRNA	Mitogen-activated protein kinase kinase kinase 8 (MAP3K8 or COT or TPL2) (2.7.11.25) plays a role in the cell cycle. MAP3K8 is required for TLR4 activation of the MEK/ERK pathway, protein serine/threonine kinase activity,Catalysis of ATP + protein serine = ADP + protein serine phosphate, and ATP + protein threonine = ADP + protein threonine phosphate intracelluare signl transduction
7	NC_056629.1	92357001	92358000	1000	*	0.000121648	0.00725129	34.1941		1690	XM_023894390.2	+
7	NC_056629.1	93559001	93560000	1000	*	0.000256913	0.012108	-31.25		262058	XM_023894357.2	+
7	NC_056629.1	94990001	94991000	1000	*	3.05228e-05	0.00260505	-33.8161		0	XR_006185010.1	-
7	NC_056629.1	99020001	99021000	1000	*	1.25879e-07	2.93813e-05	33.3851		0	XM_023874279.2	+
7	NC_056629.1	106059001	106060000	1000	*	3.40717e-09	1.26303e-06	-36.2229		35867	XM_023913350.1	-
7	NC_056629.1	106731001	106732000	1000	*	4.23137e-08	1.13261e-05	-43.7756		-7527	XM_042896519.1	-
7	NC_056629.1	109585001	109586000	1000	*	6.78187e-05	0.00468838	37.2658		-147842	XM_023916478.1	-
7	NC_056629.1	113951001	113952000	1000	*	8.54121e-06	0.000965757	27.1172		915	XM_042896591.1	+
7	NC_056629.1	118519001	118520000	1000	*	0.00122259	0.0339079	26.6458		-107915	XM_023883589.1	+
7	NC_056629.1	120478001	120479000	1000	*	5.30543e-06	0.00067249	-34.2105		32488	XR_002860117.2	+
7	NC_056629.1	122011001	122012000	1000	*	0.000664247	0.0226807	-27.4415		-213407	XR_006184869.1	-
7	NC_056629.1	129898001	129899000	1000	*	2.62132e-05	0.0023074	28.6284		51817	XM_023900593.2	+
7	NC_056629.1	139098001	139099000	1000	*	5.04372e-07	9.69799e-05	32		716	XM_023890040.2	+
7	NC_056629.1	143684001	143685000	1000	*	1.19423e-34	1.67593e-30	-79.6888	PDMR	392	XM_023899986.2	+	PREDICTED: Lactuca sativa uncharacterized LOC111904208 (LOC111904208), mRNA
7	NC_056629.1	144370001	144371000	1000	*	1.00299e-08	3.27337e-06	-32.913		2573	XM_023900040.1	-
7	NC_056629.1	144874001	144875000	1000	*	0.000577788	0.0206697	26.2828		-6484	XM_023896279.2	+
7	NC_056629.1	157940001	157941000	1000	*	2.10158e-06	0.000319087	37.5		10464	XM_023907752.1	-
7	NC_056629.1	158096001	158097000	1000	*	5.8206e-17	8.79674e-14	55.6522	PDMR	0	XM_042896224.1	-	PREDICTED: Lactuca sativa uncharacterized LOC111912012 (LOC111912012), mRNA
7	NC_056629.1	158111001	158112000	1000	*	1.21586e-09	4.9854e-07	45.6522		12871	XM_023907773.2	+
7	NC_056629.1	158198001	158199000	1000	*	6.42809e-05	0.00452033	-27.7468		1178	XR_002857045.1	+
7	NC_056629.1	162260001	162261000	1000	*	4.40569e-07	8.72568e-05	-37.5		48098	XM_023898689.1	-
7	NC_056629.1	164115001	164116000	1000	*	6.80727e-13	5.43669e-10	-61.9792	PDMR	7628	XR_006185001.1	+	PREDICTED: Lactuca sativa uncharacterized LOC122195066 (LOC122195066), ncRNA
7	NC_056629.1	164157001	164158000	1000	*	1.59803e-08	4.93655e-06	40.9902		-33229	XM_023896404.2	-
7	NC_056629.1	164641001	164642000	1000	*	4.59039e-16	6.35124e-13	-64.2123	PDMR	873	XM_023896358.2	+	PREDICTED: Lactuca sativa phytochrome C-like (LOC111900475), mRNA	Histidine kinase-like ATPase (HATPase),domains of plant red/far-red photoreceptors, the phytochromes, and includes the Arabidopsis thaliana phytochrome family phyA-phyE
7	NC_056629.1	165366001	165367000	1000	*	5.91677e-17	8.80659e-14	-40.8313		-19695	XM_023896373.2	-
7	NC_056629.1	165579001	165580000	1000	*	8.62126e-08	2.10674e-05	33.9623		4292	XM_023896388.2	+
7	NC_056629.1	170477001	170478000	1000	*	0.000964439	0.0290976	-27.5254		6599	XM_023909128.2	-
7	NC_056629.1	179587001	179588000	1000	*	7.70477e-12	5.25611e-09	29.8507		0	XM_023896934.1	-
7	NC_056629.1	180312001	180313000	1000	*	1.75587e-18	3.2545e-15	-53.836	PDMR	-28430	XM_023896894.2	-	PREDICTED: Lactuca sativa G-type lectin S-receptor-like serine/threonine-protein kinase At4g27290 (LOC111901026), mRNA ****	Plant S-receptor kinase-like genes have diverse functions in cell signalling, development, stress responses and host-pathogen defence responses. Flowering plants apply a self-incompatibility (SI) mechanism to prevent inbreeding and thereby increase genetic diversity. In most flowering plants, SI systems are controlled by a single multi-allelic locus termed the S-locus. S-locus receptor-like kinas…
7	NC_056629.1	182674001	182675000	1000	*	3.74848e-13	3.09439e-10	50.1704	PDMR	1672	XM_023892204.1	+	PREDICTED: Lactuca sativa uncharacterized LOC111896188 (LOC111896188), mRNA	Metallo-dependent phosphatase-like purple acid phosphatases are metal dependent, binding two metal ions. Metal binding ligands and residues involved in resistance to tartrate inhibition are conserved. The enzyme binds Fe3+and Zn2+ions. The metals bound differ according to source species, for example the enzyme from sweet potato binds iron and manganese (in been , sweet potato). Catalysis of the r…
7	NC_056629.1	184007001	184008000	1000	*	6.1179e-06	0.000753124	29.7619		-17455	XM_023873849.2	-
7	NC_056629.1	191961001	191962000	1000	*	7.3411e-06	0.000864694	31.5826		10527	XM_042896825.1	+
7	NC_056629.1	193323001	193324000	1000	*	1.52671e-11	9.80242e-09	-67.1733	PDMR	163844	XR_002844897.1	+	PREDICTED: Lactuca sativa small nucleolar RNA R71 (LOC111876077), ncRNA	Sialidases (neuraminidases) hydrolyse the non-reducing, terminal sialic acid linkage in various natural substrates, glycoproteins, glycolipids, gangliosides, and polysaccharides. sialidase forms part of the multi-functional haemagglutinin-sialidase glycoprotein found on the viral envelope, pathogenesis of many diseases (pathogens)
7	NC_056629.1	194184001	194185000	1000	*	4.47223e-18	7.70756e-15	47.6002		1388	XM_023892670.2	-
8	NC_056630.1	6261001	6262000	1000	*	5.77374e-07	0.000109074	39.6552		5050	XM_023873332.2	+
8	NC_056630.1	6353001	6354000	1000	*	2.01458e-18	3.66487e-15	76.4706	PDMR	-1247	XM_023872767.2	+	PREDICTED: Lactuca sativa E3 ubiquitin-protein ligase SINAT3 (LOC111876229), mRNA	Mediate ubiquitination and subsequent proteasomal degradation of target proteins to determine the substrate specificity for ubiquitylation . The zinc RING-finger type ligase binds two atoms of zinc, and is probably involved in mediating protein-protein interactions.Regulate gene expression
8	NC_056630.1	6686001	6687000	1000	*	2.88803e-14	2.95527e-11	-61.6071	PDMR	-62333	XM_023872805.2	-	PREDICTED: Lactuca sativa probable pectinesterase/pectinesterase inhibitor 61 (LOC111876261), mRNA	Pectin methylesterase catalyses the de-esterification of pectin into pectate and methanol.Pectin is one of the main components of the plant cell wall,pectinesterase plays an important role in cell wall metabolism during fruit ripening. Plant pathogen Erwinia carotovora and in fungal pathogens Aspergillus niger, pectinesterase is involved in maceration and soft-rotting of plant tissue. Plant pecti…
8	NC_056630.1	10768001	10769000	1000	*	1.42861e-23	5.19776e-20	-67.7855	PDMR	-117794	XR_002854398.2	-	PREDICTED: Lactuca sativa uncharacterized LOC111904011 (LOC111904011), ncRNA
8	NC_056630.1	14364001	14365000	1000	*	4.42474e-07	8.74578e-05	-39.45		24868	XM_042897161.1	-
8	NC_056630.1	17912001	17913000	1000	*	4.53625e-15	5.64075e-12	-54.386	PDMR	572	XM_023915311.2	-	PREDICTED: Lactuca sativa pleckstrin homology domain-containing protein 1 (LOC111919729), mRNA	Arabidopsis: Differentially expressed in FDCP 8 homology. FDCP is Predicted to enable metal ion binding activity, involved in lysosome localization; positive regulation of bone resorption; and positive regulation of ruffle assembly. In human it binds to Bid (a pro-apoptotic protein), removes Bid from transient Bid-Bax complexes, and promotes apoptosis
8	NC_056630.1	18546001	18547000	1000	*	1.18085e-07	2.79521e-05	52.5424	PDMR	19587	XM_023915329.2	-	PREDICTED: Lactuca sativa ras-related protein Rab2BV (LOC111919744), mRNA	Proteins with a small GTP-binding domain include Ras, RhoA, Rab11, translation elongation factor G, translation initiation factor IF-2, tetratcycline resistance protein TetM, CDC42, Era, ADP-ribosylation factors ,, tdhF, and many others
8	NC_056630.1	20290001	20291000	1000	*	5.66638e-05	0.00414473	25.8451		-11539	XM_023889382.2	+
8	NC_056630.1	23683001	23684000	1000	*	3.0589e-08	8.49004e-06	32.7791		0	XR_006185370.1	+
8	NC_056630.1	25788001	25789000	1000	*	1.58958e-13	1.45937e-10	27.1554		0	XR_002845356.2	-
8	NC_056630.1	27551001	27552000	1000	*	1.69367e-11	1.06519e-08	-40.7407		576	XM_023906925.2	+
8	NC_056630.1	28926001	28927000	1000	*	6.28391e-07	0.000116913	35.8379		0	XR_006186396.1	-
8	NC_056630.1	32304001	32305000	1000	*	5.08752e-09	1.77855e-06	32.354		13807	XM_023889010.2	+
8	NC_056630.1	41137001	41138000	1000	*	3.81738e-05	0.00309407	-33.6667		-10366	XM_042897203.1	+
8	NC_056630.1	46809001	46810000	1000	*	2.68362e-08	7.59729e-06	-40.7313		1147	XM_023900200.1	+
8	NC_056630.1	52559001	52560000	1000	*	4.09161e-11	2.38925e-08	-34.4828		416	XM_023912500.2	-
8	NC_056630.1	55944001	55945000	1000	*	7.19486e-10	3.05969e-07	60.7143	PDMR	-723	XM_023906971.1	-	PREDICTED: Lactuca sativa (LOC111911188), mRNA
8	NC_056630.1	66557001	66558000	1000	*	0.000558217	0.0202287	-32.8431		2312	XM_023898473.2	-
8	NC_056630.1	66819001	66820000	1000	*	5.874e-07	0.000110755	36.3636		4079	XM_023898455.2	-
8	NC_056630.1	80997001	80998000	1000	*	5.89166e-06	0.000730768	-44.883		32069	NA	+
8	NC_056630.1	81927001	81928000	1000	*	5.20756e-09	1.80129e-06	37.5		103751	XM_023901867.1	-
8	NC_056630.1	85020001	85021000	1000	*	1.56091e-09	6.08477e-07	48.2353		-9977	XM_023874748.2	-
8	NC_056630.1	87869001	87870000	1000	*	1.99698e-07	4.46864e-05	33.3053		-7804	XR_002855857.1	+
8	NC_056630.1	88335001	88336000	1000	*	7.60403e-20	1.69769e-16	78.9725	PDMR	-350	XM_023904210.2	+	PREDICTED: Lactuca sativa putative chloride channel-like protein CLC-g (LOC111908376), mRNA	Chloride channels (CLCs) constitute voltage-gated channels contribute to a number of plant-specific functions, such as regulation of turgor, stomatal movement, nutrient transport and metal tolerance. Arabidopsis
8	NC_056630.1	96401001	96402000	1000	*	6.9857e-08	1.75509e-05	25.1908		225	XM_023905394.2	-
8	NC_056630.1	97204001	97205000	1000	*	1.0688e-26	5.83301e-23	31.6462		-147649	XR_006185897.1	-
8	NC_056630.1	101821001	101822000	1000	*	1.95874e-17	3.05424e-14	76.3158	PDMR	-3507	XM_023893077.1	-	PREDICTED: Lactuca sativa uncharacterized LOC111897109 (LOC111897109), mRNA
8	NC_056630.1	109350001	109351000	1000	*	1.1946e-08	3.79779e-06	37.8614		0	XM_023897863.2	+
8	NC_056630.1	109378001	109379000	1000	*	8.02593e-06	0.000927649	29.2549		16213	XM_023897864.2	-
8	NC_056630.1	115398001	115399000	1000	*	2.1664e-14	2.3912e-11	-32.5269		-645	XM_042897143.1	+
8	NC_056630.1	118805001	118806000	1000	*	1.97497e-07	4.43962e-05	-39.9394		13882	XM_023885401.2	-
8	NC_056630.1	119195001	119196000	1000	*	3.61038e-06	0.000493277	-31.7817		2472	XM_023885388.2	+
8	NC_056630.1	119280001	119281000	1000	*	1.00048e-05	0.00109198	28.6138		-14466	XM_023885394.2	-
8	NC_056630.1	120376001	120377000	1000	*	2.61622e-19	5.35426e-16	-46.4286		0	XM_023912709.2	+
8	NC_056630.1	120497001	120498000	1000	*	1.43761e-11	9.29107e-09	39.0244		18277	XM_023912768.1	-
8	NC_056630.1	122701001	122702000	1000	*	2.39773e-11	1.47214e-08	-72.5	PDMR	2322	XM_042897492.1	+	PREDICTED: Lactuca sativa probable protein S-acyltransferase 3 (LOC111917075), transcript variant X2, mRNA	The elongator complex is a major component of the RNA polymerase II (RNAPII) holoenzyme responsible for transcriptional elongation. It binds to both naked and nucleosomal DNA, can acetylate both core and nucleosomal histones, and is involved in chromatin remodelling
8	NC_056630.1	126080001	126081000	1000	*	2.88304e-06	0.000411651	25.339		-37760	XR_002859201.2	-
8	NC_056630.1	129159001	129160000	1000	*	0.000134588	0.00779099	36.7647		0	XM_023903400.1	+
8	NC_056630.1	132634001	132635000	1000	*	1.74256e-06	0.000271715	42.374		-35157	XR_002856366.1	+
8	NC_056630.1	135527001	135528000	1000	*	1.56231e-05	0.00152862	-26.4113		26942	NA	-
8	NC_056630.1	146994001	146995000	1000	*	0.000680722	0.0230113	-31.3725		8445	XM_023882896.1	-
8	NC_056630.1	149462001	149463000	1000	*	1.99662e-06	0.000305511	47.5417		-333	XR_002847586.2	+
8	NC_056630.1	151503001	151504000	1000	*	5.13019e-30	3.87665e-26	63.1405	PDMR	362	XM_023873940.2	+	PREDICTED: Lactuca sativa pentatricopeptide repeat-containing protein At3g57430, chloroplastic (LOC111877413), mRNA	Mitochondrial protein that binds RNA, is a group of plant pentatricopeptide repeat-containing proteins, including EMB1417 (At4g21190) and At4g18975 from Arabidopsis. The EMB1417 gene has been identified as the EMBRYO-DEFECTIVE (EMB) gene required for growth and development.
8	NC_056630.1	154947001	154948000	1000	*	9.14987e-07	0.000159086	25.376		-71	XM_023874713.2	+
8	NC_056630.1	164795001	164796000	1000	*	0.000754012	0.0246737	-28.125		-17554	XM_023877443.1	-
8	NC_056630.1	170719001	170720000	1000	*	6.54686e-05	0.00458397	-29.2857		23410	XR_002846942.1	+
8	NC_056630.1	174293001	174294000	1000	*	5.61498e-07	0.000106897	38.1972		22512	XM_023907579.2	-
8	NC_056630.1	186051001	186052000	1000	*	3.16394e-10	1.48713e-07	38.7346		1566	XM_042897655.1	+
8	NC_056630.1	197904001	197905000	1000	*	3.21337e-13	2.74492e-10	-27.393		2312	XM_023899557.1	-
8	NC_056630.1	198195001	198196000	1000	*	2.08391e-08	6.14753e-06	46.0805		5656	XM_023899493.2	-
8	NC_056630.1	200160001	200161000	1000	*	4.8409e-05	0.00367783	30.5367		1316	XM_023899477.2	-
8	NC_056630.1	201893001	201894000	1000	*	3.60918e-13	3.03033e-10	-56.2128	PDMR	588	XM_023899455.2	+	PREDICTED: Lactuca sativa syntaxin-132 (LOC111903706), mRNA	Syntaxins are the prototype family of SNARE proteins (SNAP receptors) ,which are associated with the fusing membranes They usually consist of three main regions - a C-terminal transmembrane region, a central SNARE domain conserved (arginine or glutamine residue) in all syntaxins IPR000727, and an N-terminal domain which varies between syntaxin isoforms. The function of syntaxins is determined by …
8	NC_056630.1	206205001	206206000	1000	*	1.00111e-05	0.00109198	-37.2506		-65644	XM_042897734.1	-
8	NC_056630.1	210217001	210218000	1000	*	2.05135e-05	0.00189215	-39.619		-49706	NA	-
8	NC_056630.1	231538001	231539000	1000	*	1.28451e-07	2.98307e-05	25.4572		-5757	XM_023889322.1	+
8	NC_056630.1	231769001	231770000	1000	*	4.66223e-07	9.09955e-05	-25.1741		2031	XM_023889335.2	-
8	NC_056630.1	233210001	233211000	1000	*	0.000602763	0.0212214	-25.2776		-25479	XM_023885451.2	-
8	NC_056630.1	261826001	261827000	1000	*	1.28091e-05	0.00131484	29.1667		-181959	XM_023886074.2	+
8	NC_056630.1	264042001	264043000	1000	*	7.17852e-10	3.05969e-07	32.9915		3842	XM_023874059.2	+
8	NC_056630.1	270494001	270495000	1000	*	9.38023e-23	3.17748e-19	50.3497	PDMR	0	XM_042897521.1	-	PREDICTED: Lactuca sativa probable inactive poly [ADP-ribose] polymerase SRO2 (LOC111884896), mRNA	This family represents plant-specific inactive ADP-ribosyltransferases that regulate oxidative stress, hormonal and developmental responses. probable inactive poly [ADP-ribose] polymerases SRO (SIMILAR TO RCD) 1-5. RCD1 is required for embryogenesis, vegetative and reproductive development, and abiotic stress responses. The RST domin is a protein-protein interaction domain suggested to be critica…
8	NC_056630.1	270940001	270941000	1000	*	5.20742e-09	1.80129e-06	-36.9565		-352	XM_023891944.2	+
8	NC_056630.1	273011001	273012000	1000	*	0.000259698	0.0122006	25.8667		8886	XR_002845989.2	-
8	NC_056630.1	275423001	275424000	1000	*	6.87933e-08	1.7328e-05	47.8288		9379	XM_023915399.2	-
8	NC_056630.1	277572001	277573000	1000	*	5.9854e-08	1.53519e-05	-31.8475		658	XM_023908251.2	-
8	NC_056630.1	298486001	298487000	1000	*	2.41854e-07	5.24472e-05	-27.2727		-28337	XM_023885173.2	+
8	NC_056630.1	307805001	307806000	1000	*	8.55213e-08	2.09506e-05	26.8952		-90527	XM_023892560.2	-
9	NC_056631.1	4173001	4174000	1000	*	1.28776e-06	0.000212254	44.9521		10450	XM_023915847.2	-
9	NC_056631.1	11325001	11326000	1000	*	9.74543e-05	0.00612504	-30.5085		2128	XM_023877646.2	+
9	NC_056631.1	12060001	12061000	1000	*	3.40934e-18	5.98067e-15	50.1206	PDMR	1128	XM_023877661.2	-	PREDICTED: Lactuca sativa F-box/kelch-repeat protein SKIP25 (LOC111881243), mRNA	It's Component of SCF(ASK-cullin-F-box) E3 ubiquitin ligase complexes, which may mediate the ubiquitination and subsequent proteasomal degradation of target proteins.
9	NC_056631.1	16806001	16807000	1000	*	2.33775e-07	5.09529e-05	51	PDMR	185	XM_023899695.2	-	PREDICTED: Lactuca sativa GPN-loop GTPase 3 (LOC111903930), mRNA	GPN-loop GTPase 3 (GPN3) is a small GTPase that is required for nuclear targeting of RNA polymerase II. is involved in sister chromatid cohesion
9	NC_056631.1	18242001	18243000	1000	*	1.70868e-08	5.21282e-06	-39.4711		0	XM_023873002.2	+
9	NC_056631.1	19580001	19581000	1000	*	7.42685e-55	7.29578e-50	76.6622	PDMR	0	XM_023873019.2	+	PREDICTED: Lactuca sativa N-terminal acetyltransferase B complex auxiliary subunit NAA25 (LOC111876495), transcript variant X1, mRNA	NatB acetylates the Tpm1 protein and regulates and tropomyosin-actin interactions. (yeast)
9	NC_056631.1	20712001	20713000	1000	*	2.30691e-22	6.86726e-19	76.6582	PDMR	2256	XM_023913627.2	+	PREDICTED: Lactuca sativa zinc finger CCCH domain-containing protein 66 (LOC111917982), mRNA	Dual-specificity phosphatases (DUSPs) function as protein-serine/threonine phosphatases and protein-tyrosine-phosphatases , is the mitogen-activated protein kinase (MAPK) phosphatases (MKPs), deactivate MAPKs by dephosphorylating the threonine and tyrosine residues in the conserved Thr-Xaa-Tyr motif .
9	NC_056631.1	21366001	21367000	1000	*	3.00782e-42	7.38685e-38	42.2578		-6674	XM_023895117.2	+
9	NC_056631.1	21755001	21756000	1000	*	7.97736e-05	0.00527716	40		3948	XM_023876489.2	+
9	NC_056631.1	23125001	23126000	1000	*	1.13939e-07	2.70357e-05	-27.4577		-29282	XM_023878962.2	+
9	NC_056631.1	26240001	26241000	1000	*	7.33004e-24	2.88027e-20	64.6019	PDMR	0	XR_002853704.2	-	PREDICTED: Lactuca sativa uncharacterized LOC111902205 (LOC111902205), ncRNA
9	NC_056631.1	33664001	33665000	1000	*	0.000276436	0.0126837	-29.1667		1259	XM_023875834.2	+
9	NC_056631.1	37806001	37807000	1000	*	4.48322e-11	2.57549e-08	-57.9221	PDMR	-39932	XR_002847225.2	+	PREDICTED: Lactuca sativa uncharacterized LOC111882740 (LOC111882740), ncRNA
9	NC_056631.1	40286001	40287000	1000	*	1.80079e-22	5.70648e-19	71.5951	PDMR	-52407	XM_023894210.2	+	PREDICTED: Lactuca sativa protein trichome birefringence-like 34 (LOC111898292), mRNA	Richome birefringence-like (TBL) is a plant protein family.The TBL family is proposed to encode wall polysaccharide specific O-acetyltransferases.The conserved glycine-aspartate-serine (GDS) signature, similar to GDSL found in some esterases/lipases, impact pathogen resistance, freezing tolerance, and cellulose. (A biosynthesis)
9	NC_056631.1	42213001	42214000	1000	*	9.09115e-25	4.05941e-21	-31.8709		-24354	XM_023894142.2	-
9	NC_056631.1	44101001	44102000	1000	*	0.00012387	0.00733475	-27.2727		1626	XM_023872633.2	+
9	NC_056631.1	44445001	44446000	1000	*	1.91861e-05	0.00179704	34.2857		2999	XM_023872655.2	+
9	NC_056631.1	51615001	51616000	1000	*	1.62586e-10	8.27546e-08	-35.2381		411	XR_006187220.1	+
9	NC_056631.1	53154001	53155000	1000	*	2.2981e-07	5.06176e-05	41.0959		-450	XM_023908426.1	+
9	NC_056631.1	55413001	55414000	1000	*	0.000113538	0.00689333	-32.454		23611	XM_023913370.2	-
9	NC_056631.1	56079001	56080000	1000	*	0.000220264	0.0108477	-25.1511		567	XM_023914807.2	-
9	NC_056631.1	61599001	61600000	1000	*	2.16053e-06	0.000324526	25.0354		-36766	XM_042898612.1	-
9	NC_056631.1	63646001	63647000	1000	*	1.42221e-05	0.00142562	32.1429		299	XM_023897595.2	-
9	NC_056631.1	67815001	67816000	1000	*	1.26431e-15	1.67838e-12	-44.7285		0	XR_006187176.1	-
9	NC_056631.1	69071001	69072000	1000	*	1.85718e-24	7.93218e-21	73.4697	PDMR	3144	XM_023913714.2	-	PREDICTED: Lactuca sativa uncharacterized LOC111918051 (LOC111918051), mRNA
9	NC_056631.1	69632001	69633000	1000	*	1.09404e-12	8.52958e-10	-52.9412	PDMR	406	XM_023881609.2	-	PREDICTED: Lactuca sativa 2-hydroxy-6-oxononadienedioate/2-hydroxy-6-oxononatrienedioate hydrolase (LOC111885350), mRNA	The chemical reactions and pathways resulting in the breakdown of aromatic compounds, any substance containing an aromatic carbon ring.
9	NC_056631.1	70164001	70165000	1000	*	7.86358e-13	6.22968e-10	-33.3333		-51508	NA	-
9	NC_056631.1	70583001	70584000	1000	*	1.5114e-05	0.00149368	-31.8033		1869	XM_023881623.2	-
9	NC_056631.1	73665001	73666000	1000	*	1.22484e-08	3.88136e-06	27.4163		61802	XM_023892765.2	+
9	NC_056631.1	85470001	85471000	1000	*	1.87821e-10	9.27165e-08	-35.2518		6956	XM_042898230.1	+
9	NC_056631.1	97692001	97693000	1000	*	0.000207903	0.0104505	26.5441		47256	XM_023907859.1	-
9	NC_056631.1	97872001	97873000	1000	*	6.87861e-08	1.7328e-05	33.8731		0	XR_006186753.1	+
9	NC_056631.1	103957001	103958000	1000	*	2.3736e-08	6.798e-06	-25.4583		254391	XM_023890404.1	-
9	NC_056631.1	118766001	118767000	1000	*	0.000159094	0.00875554	-28.3475		0	XR_002850092.2	-
9	NC_056631.1	134580001	134581000	1000	*	2.99109e-09	1.12579e-06	-39.2523		0	XM_023880850.2	+
9	NC_056631.1	136010001	136011000	1000	*	1.65306e-06	0.000261495	29.4118		-29124	XM_042898339.1	-
9	NC_056631.1	139165001	139166000	1000	*	0.000164253	0.00894904	-26.8293		-15605	XM_023884266.2	+
9	NC_056631.1	146475001	146476000	1000	*	3.16037e-09	1.17598e-06	-37.0354		0	XM_023908490.2	+
9	NC_056631.1	146644001	146645000	1000	*	6.33551e-09	2.1461e-06	-38.7683		429	XM_023908421.2	+
9	NC_056631.1	148297001	148298000	1000	*	4.35333e-14	4.3197e-11	-35.1708		0	XM_023908463.2	-
9	NC_056631.1	148372001	148373000	1000	*	6.27547e-07	0.000116913	52.9412	PDMR	-48160	XM_023908430.1	-	PREDICTED: Lactuca sativa uncharacterized mitochondrial protein AtMg00810-like (LOC111912700), mRNA	A reverse transcriptase gene is usually indicative of a mobile element such as a retrotransposon or retrovirus. represents the DNA/RNA polymerase superfamily.
9	NC_056631.1	152874001	152875000	1000	*	0.000268039	0.0124378	-34.7976		5683	XM_023912638.2	-
9	NC_056631.1	158301001	158302000	1000	*	7.76679e-05	0.00518323	-32.0833		0	XM_023912530.2	-
9	NC_056631.1	163952001	163953000	1000	*	5.3134e-12	3.75513e-09	-27.2727		64377	XM_023885921.2	+
9	NC_056631.1	165441001	165442000	1000	*	1.0312e-13	9.74037e-11	-60.894	PDMR	0	XM_023885902.2	+	PREDICTED: Lactuca sativa endoplasmic reticulum oxidoreductin-1 (LOC111889744), mRNA	Removal of H2O2, oxidation of toxic reductants, biosynthesis and degradation of lignin, suberization, auxin catabolism, response to environmental stresses such as wounding, pathogen attack and oxidative stress. These functions might be dependent on each isozyme/isoform in each plant tissue. Lettuce SHELF LIFE !! INSV
9	NC_056631.1	169039001	169040000	1000	*	3.97028e-07	7.98508e-05	-38.8685		0	XM_042898522.1	-
9	NC_056631.1	172529001	172530000	1000	*	1.46871e-15	1.92372e-12	60	PDMR	0	XM_023916705.2	+	PREDICTED: Lactuca sativa 60S ribosomal protein L7-4 (LOC111921126), mRNA	The large subunit ribosomal proteins are composed of a globular, surfaced-exposed domain with long finger-like projections that extend into the rRNA core to stabilise its structure, interact with multiple RNA elements, often from different domains;While the crucial activities of decoding and peptide transfer are RNA based, proteins play an active role in functions that may have evolved to streaml…
9	NC_056631.1	178078001	178079000	1000	*	5.2706e-09	1.8167e-06	47.2448		0	NA	-
9	NC_056631.1	181121001	181122000	1000	*	1.4686e-10	7.51398e-08	-58.0745	PDMR	9951	XM_023912781.2	-	PREDICTED: Lactuca sativa ADP-ribosylation factor 1-like (LOC111917121), mRNA	ADP-ribosylation factor-like 6 binding factor 1 (Arl6IP1 or Arl6ip-1) . Arl6IP1 is an endoplasmic reticulum (ER) protein that has an important role in cell conduction and material transport. Arl6IP1, a tetraspan membrane protein, is an anti-apoptotic protein specific to multicellular organisms, and is a potential player in shaping the ER tubules in mammalian cells
9	NC_056631.1	183804001	183805000	1000	*	4.6696e-06	0.000607575	34.2763		529	NA	-
9	NC_056631.1	184736001	184737000	1000	*	0.000385685	0.0158113	-28.2695		-90412	XM_023889051.2	+
9	NC_056631.1	190815001	190816000	1000	*	2.92626e-19	5.86656e-16	-49.8187		0	XM_023894942.2	+
9	NC_056631.1	192647001	192648000	1000	*	9.98868e-08	2.405e-05	56.6783	PDMR	-258	XM_023899217.2	+	PREDICTED: Lactuca sativa uncharacterized LOC111903443 (LOC111903443), mRNA
9	NC_056631.1	199947001	199948000	1000	*	2.95875e-09	1.1179e-06	25.9558		0	XM_042898319.1	-
9	NC_056631.1	200157001	200158000	1000	*	1.34442e-13	1.24593e-10	-56.3782	PDMR	3675	XM_042898222.1	+	PREDICTED: Lactuca sativa uncharacterized LOC122195955 (LOC122195955), transcript variant X1, mRNA
9	NC_056631.1	201531001	201532000	1000	*	2.69225e-07	5.68761e-05	37.6712		0	XM_023891398.2	+
NA	NW_019673182.1	1001	2000	1000	*	1.64277e-07	3.73561e-05	35.2273		156	XM_023898796.2	+
NA	NW_019681028.1	5001	6000	1000	*	6.23413e-20	1.42421e-16	27.4586		-244	XM_023891522.1	-
NA	NW_019682995.1	16001	17000	1000	*	1.70239e-11	1.06519e-08	54.8387	PDMR	NA	NA	NA
NA	NW_019682188.1	22001	23000	1000	*	1.82575e-10	9.11677e-08	38.1359		NA	NA	NA
NA	NW_019678453.1	122001	123000	1000	*	5.37699e-06	0.000679807	-32.9728		-29522	NA	-
NA	NW_019675304.1	259001	260000	1000	*	4.33528e-10	1.94464e-07	-36.0821		-4628	XM_023914096.1	+
NA	NW_019677528.1	349001	350000	1000	*	6.86271e-08	1.7328e-05	-53.4965	PDMR	-12164	XM_023873875.2	-	PREDICTED: Lactuca sativa conserved oligomeric Golgi complex subunit 2 (LOC111877354), mRNA	COG complex. The COG complex comprises eight proteins COG1-8 and plays critical roles in Golgi structure and function and it is involved in retrograde vesicular trafficking within the Golgi apparatus.COG complex,together with exocyst, Golgi-associated retrograde protein (GARP) and Dsl1 complexes, is a member of the CATHR (complexes associated with tethering containing helical rods) family sharing…
NA	NW_019673970.1	363001	364000	1000	*	6.71224e-12	4.70984e-09	-38.8166		0	XR_006187663.1	-
NA	NW_019672057.1	520001	521000	1000	*	2.05335e-08	6.07563e-06	37.5		1373	XM_023904900.2	+
NA	NW_019678575.1	534001	535000	1000	*	2.80761e-09	1.06901e-06	49.6907		2160	XM_042898904.1	+
NA	NW_019678698.1	1753001	1754000	1000	*	8.10808e-12	5.49309e-09	26.0274		1621	XR_002850635.1	-

## Sheet: Legend
Parameter	Explanation
meth.diff	Difference in methylation of diploid and neotetraploid lines. Positive values indicate hypermethylation in diploids, negative values indicate hypermethylation in neotetraploids
pvalue	Statistical probability of obtaining methylation difference equal to or more extreme than actually observed
qvalue	pvalue adjusted for multiple testing correction
PDMR	Pivotal differentially methylated regions (absolute difference in percent methylation between diploids and neotetraploids > 50)
green highlight	Predicted protein function involved in plant development, and reaction to biotic and abiotic stressors
